# Supplementary material for: Targeting the Tie2–αvβ3 integrin axis with bi-specific reagents for the inhibition of angiogenesis
Source: BMC Biol. 2018 Aug 17;16:92. doi: 10.1186/s12915-018-0557-9 (PMC6097439; doi:10.1186/s12915-018-0557-9)
Supplement: Supplementary file 2 — Supporting data values. (XLSX 4536 kb) [file 12915_2018_557_MOESM2_ESM.xlsx]

## Sheet: Fig1H
			Tie2 binding (FITC)	Expression PE	Normalized binding/expression	Normalized to Ang2-BD WT	SEM Values
		Ang2-BD WT	17994	36924	0.487325	1.00004	0.0001321
			18000	36930	0.487409	1.00021
			17986	36918	0.487188	0.999755
		Ang2-BD BC5	17711	22699	0.780255	1.60116	0.0363516
			18233	23999	0.75974	1.55906
			19805	24150	0.820083	1.68289
		Ang2-BD BC6	22269	38149	0.583737	1.19788	0.0579689
			20799	37149	0.55988	1.14893
			19599	40029	0.48962	1.00475
		Ang2-BD BC10	20525	39066	0.525393	1.07816	0.0239758
			17525	35066	0.499772	1.02558
			18305	33916	0.539716	1.10755
		Ang2-BD BC14	14805	35161	0.421063	0.864061	0.0230467
			15025	34161	0.439829	0.902571
			16025	34840	0.45996	0.943881
		Ang2-BD BC35	14900	35340	0.421619	0.865201	0.0226846
			14100	32050	0.439938	0.902794
			13820	30050	0.4599	0.943759

## Sheet: Fig1I
		avb3 binding (FITC)	Expression PE	Normalized binding/expression	SEM Values
	Ang2-BD WT	1418	23171	0.0611972	0.00547358
		1485	21214	0.0700009
		1620	20214	0.0801425
	Ang2-BD BC5	7975	8321	0.958418	0.0246095
		8025	7980	1.00564
		7880	8560	0.920561
	Ang2-BD BC6	14152	12376	1.1435	0.0454182
		14392	11976	1.20174
		14260	10976	1.2992
	Ang2-BD BC10	11466	13493	0.849774	0.0444921
		10966	12160	0.901809
		10500	10485	1.00143
	Ang2-BD BC14	10739	10843	0.990409	0.0607183
		10550	9500	1.11053
		11050	12265	0.900938
	Ang2-BD BC35	9251	9522	0.97154	0.0314994
		9401	9322	1.00847
		8290	9200	0.901087
		a5b1 binding (FITC)	Expression PE	Normalized binding/expression	SEM Values
	Ang2-BD WT	1466	25576	0.0573194	0.00207188
		1540	24830	0.0620217
		1420	25830	0.0549748
	Ang2-BD BC5	1498	9754	0.153578	0.0207262
		1595	7950	0.200629
		1425	10950	0.130137
	Ang2-BD BC6	1464	15065	0.0971789	0.00682311
		950	9420	0.100849
		1060	8890	0.119235
	Ang2-BD BC10	1655	15039	0.110047	0.0262825
		1890	12550	0.150598
		2190	10900	0.200917
	Ang2-BD BC14	1963	14249	0.137764	0.022176
		2270	11340	0.200176
		1997	15340	0.130183
	Ang2-BD BC35	1535	11528	0.133154	0.0210175
		1605	10696	0.150056
		1260	15696	0.0802752
		avb5 binding (FITC)	Expression PE	Normalized binding/expression	SEM Values
	Ang2-BD WT	2066	22316	0.0925793	0.00818199
		2135	21350	0.1
		2330	19420	0.119979
	Ang2-BD BC5	6302	8741	0.72097	0.0231567
		6210	8280	0.75
		6490	8110	0.800247
	Ang2-BD BC6	4224	14931	0.282901	0.0367382
		4120	13730	0.300073
		4620	11530	0.400694
	Ang2-BD BC10	3801	13250	0.286868	0.0229092
		4310	12310	0.350122
		4410	12250	0.36
	Ang2-BD BC14	3058	13067	0.234025	0.980277
		2950	9850	0.299492
		3005	937	3.20704
	Ang2-BD BC35	3200	10461	0.305898	0.0575447
		3258	8121	0.401182
		2120	10500	0.201905
		a4b7 binding (FITC)	Expression PE	Normalized binding/expression	SEM Values
	Ang2-BD WT	442	22262	0.0198545	0.00574991
		590	19500	0.0302564
		680	17100	0.0397661
	Ang2-BD BC5	366	8534	0.0428873	0.005837
		376	7520	0.05
		290	9650	0.0300518
	Ang2-BD BC6	312	14618	0.0213435	0.00851032
		365	12050	0.0302905
		523	10430	0.0501438
	Ang2-BD BC10	280	13435	0.0208411	0.00555206
		358	11915	0.0300462
		470	11730	0.0400682
	Ang2-BD BC14	302	13354	0.0226149	0.0050586
		337	11200	0.0300893
		410	10230	0.0400782
	Ang2-BD BC35	267	9818	0.0271949	0.0038155
		315	10326	0.0305055
		422	10568	0.0399319
		a2bb3 binding (FITC)	Expression PE	Normalized binding/expression	SEM Values
	Ang2-BD WT	642	25237	0.0254388	0.00433116
		750	24920	0.0300963
		862	21486	0.0401191
	Ang2-BD BC5	2500	9041	0.276518	0.0377673
		3100	10310	0.300679
		3310	8276	0.399952
	Ang2-BD BC6	2441	16670	0.146431	0.030075
		3175	15865	0.200126
		3148	12562	0.250597
	Ang2-BD BC10	909	13969	0.0650727	0.00434293
		978	13900	0.0703597
		1114	13940	0.0799139
	Ang2-BD BC14	2301	15055	0.15284	0.0434295
		2856	14250	0.200421
		4160	13856	0.300231
	Ang2-BD BC35	3547	11803	0.300517	0.0145229
		3251	10145	0.320453
		3385	9658	0.350487
		a3b1 binding (FITC)	Expression PE	Normalized binding/expression	SEM Values
	Ang2-BD WT	308	29644	0.01039	0.00449999
		414	20300	0.0203941
		162	32150	0.00503888
	Ang2-BD BC5	229	6439	0.0355645	0.00602944
		228	5670	0.0402116
		160	7900	0.0202532
	Ang2-BD BC6	257	10386	0.0247448	0.00450272
		292	9682	0.0301591
		307	7652	0.0401202
	Ang2-BD BC10	304	14112	0.021542	0.00534779
		339	11112	0.0305076
		325	8112	0.0400641
	Ang2-BD BC14	274	13890	0.0197264	0.00341419
		245	12100	0.0202479
		275	9100	0.0302198
	Ang2-BD BC35	284	10279	0.0276291	0.00394919
		279	9279	0.0300679
		320	7900	0.0405063

## Sheet: Fig2A
Data points from SPR
Time	Ang2-BD WT	Ang2-BD BC5	Ang2-BD BC6	Ang2-BD BC10	IBB
0	-0.99	0.53	-0.05	2.77	0.53
0.9	1.09	3.27	7.06	18.43	16
1.8	2	6.86	16.57	41.43	20
2.7	1.15	9.09	27.61	62.04	24.76
3.6	3.57	12.91	38.35	80.15	22.19
4.5	1.15	16.3	46.51	96.48	23.43
5.4	0.45	21.2	57.82	113	19.85
6.3	-0.77	24.15	64.64	124.39	20.46
7.2	2.7	26.69	73.83	135.18	18.56
8.1	1.45	30.34	82.03	145.81	18.98
9	1.18	32.98	86.61	153.06	17.82
9.9	2.09	35.11	95.68	162.58	18.21
10.8	1.05	39.12	100.94	168.66	22.94
11.7	2.09	41.05	107.55	173.13	18.59
12.6	2.16	43.2	112.46	180.43	22.4
13.5	1.56	47.29	117.4	184.44	14.03
14.4	3.99	50.24	122.31	188.99	18.4
15.3	2.54	52.99	127.37	194.49	17.03
16.2	1.53	57.05	130.93	197.7	19.97
17.1	1.89	57.67	138.5	200.7	16.89
18	1.13	60.89	140.04	205.27	17.37
18.9	3.46	64.25	142.26	206.92	18.45
19.8	1.54	67.1	147.33	209.54	19.1
20.7	1.14	68.52	150.71	212.45	17.77
21.6	2.65	69.77	152.69	215.17	19.53
22.5	0.66	74.39	156.63	218.05	16.7
23.4	2.67	75.47	158.6	220.15	19.49
24.3	1.87	79.87	160.2	222.39	18.34
25.2	1.79	80.22	164.57	223.36	18.61
26.1	2.08	81.72	167.05	228.81	23.26
27	2.67	85.43	169.41	226.07	20.93
27.9	3.17	85.7	170.78	230.58	20.25
28.8	1.5	90.65	172.98	232.46	19.05
29.7	3.75	91.68	177.44	233.11	19.36
30.6	4.13	93.56	178.83	235.62	21.45
31.5	3.38	94	181.22	237.8	20.8
32.4	3.5	98.34	182.18	239.43	22.24
33.3	2.58	99.82	185	241.49	27.3
34.2	2.73	101.87	185.86	242.13	27.25
35.1	1.95	101.86	187.57	244.69	23.87
36	2.55	103.56	188.22	246.3	24.4
36.9	2.19	107.19	190.59	247.5	25.83
37.8	1.61	109.75	191.48	248.08	24.73
38.7	1.02	111.04	194.85	250.62	26.38
39.6	3.01	112.1	195.96	250.43	23.82
40.5	3.77	113.35	196.61	251.88	26.29
41.4	3.36	114.88	197.08	253.95	26.81
42.3	3.48	116.14	198.64	252.82	26.96
43.2	1.68	118.46	202.2	255.61	25.52
44.1	3.88	120.67	202.63	257.71	26.52
45	2.01	121.98	204.87	257.7	25.86
45.9	4.58	123.14	204.39	258.58	24.88
46.8	4.47	125.1	205.71	259.62	25.8
47.7	2.2	125.35	207.56	260.22	24.95
48.6	3.77	126.87	208.48	261.87	26.73
49.5	3.7	130.99	210.55	262.58	22.59
50.4	4.92	130.67	212.75	264.62	22.55
51.3	4.3	132.11	213.86	262.96	22.43
52.2	3.68	132.75	213.61	266.78	19
53.1	4.58	135.49	214.01	265.79	19.77
54	3.55	136.73	214.62	270.36	16.2
54.9	3.82	138.17	216.14	269.49	17.64
55.8	1.93	138.47	217.2	269.79	13.47
56.7	4.25	140.54	218.33	271.39	10.08
57.6	4.3	141.2	221.1	271.39	6.48
58.5	3.25	144.59	219.1	271.86	3.04
59.4	2.48	144.2	221.29	273.91	1.68
60.3	4.41	145.09	222.12	274.91	-0.78
61.2	3.5	146.72	224.8	276.07	1.87
62.1	5.4	145.6	224.04	276.73	-5.03
63	5.49	147.88	225.17	277.74	-8.11
63.9	3.87	151.88	227.06	278.09	-10.12
64.8	4.22	152.2	227.14	278.51	-11.95
65.7	4.18	153.72	228.23	279.5	-9.74
66.6	3.83	154.2	227.76	280.62	-10.28
67.5	1.65	156.11	229.24	281.36	-13.77
68.4	1.7	155.01	228.14	284.45	-11.77
69.3	3.23	157.11	230.57	283.46	-12.83
70.2	2.49	157.24	230.69	283.74	-9.58
71.1	4.13	159.82	232.41	284.7	-11.97
72	3.76	158.12	232.55	286.43	-12.47
72.9	3.59	161.01	232	285.32	-12.09
73.8	5.1	161.02	234.21	286.39	-14.13
74.7	3.83	164.49	235.92	286.25	-14.93
75.6	3.75	164.18	235.2	288.65	-12.88
76.5	5.72	165.27	236.49	287.49	-11.17
77.4	3.02	165.64	236.86	290.34	-13.02
78.3	4.49	167.35	239.22	291.02	-13.52
79.2	3.92	168.88	236.44	294.12	-11.76
80.1	2.62	169.02	239.39	293.42	-11.7
81	3.5	169.64	239.6	292.43	-13.17
81.9	3.84	171.07	240.94	295.58	-12.85
82.8	2.93	173.11	242.79	293.98	-12.68
83.7	4.37	172.97	243.52	295.37	-12.78
84.6	2.95	175.26	242.07	295.2	-12.11
85.5	5.36	175.33	244.29	295.78	-11.95
86.4	3.42	176.46	245.59	296.33	-13.37
87.3	4.55	177.35	245.18	296.35	-14.4
88.2	4.89	178.75	246.4	298.16	-10.64
89.1	4.27	178.74	247.96	299.04	-15.85
90	2.57	179.16	248.75	300.03	-14.31
90.9	4.25	181.75	248.15	299.04	-11.45
91.8	3.85	180.07	248.07	299.93	-12.02
92.7	4.65	182.17	251.21	301.97	-14.42
93.6	4.19	182.17	250.55	302.07	-15.78
94.5	4.72	184.47	250.14	302.95	-14.75
95.4	3.3	184.91	250.89	301.27	-12.92
96.3	2.99	185.84	252.15	301.67	-12.17
97.2	4.41	186.78	251.74	302.81	-13.5
98.1	4.16	186.81	253.24	304.8	-13.7
99	2.87	186.93	254.2	305.23	-13.9
99.9	4.08	190.86	254.64	304.2	-11.33
100.8	3.71	189.52	253.75	304.46	-15.7
101.7	4.43	190.84	255.68	305.39	-13.98
102.6	3.64	191.67	255.74	306.41	-15.85
103.5	3.51	193.46	257.26	307.8	-15.87
104.4	4	193.8	258.02	307.13	-15.78
105.3	2.19	194.82	258.01	306.94	-14.98
106.2	2.38	194.18	257.96	308.08	-14.79
107.1	3.8	195.55	260.63	308.63	-17.33
108	2.18	196.38	260.45	308.87	-15.23
108.9	4.11	197.36	260.5	308.83	-14.98
109.8	4.41	200.07	260.39	309.4	-15.56
110.7	2.99	199.53	261.84	309.25	-15.73
111.6	3.39	198.9	263.12	309.55	-17.15
112.5	6.36	199.94	261.97	311.28	-16.31
113.4	3.13	200.52	263.61	309.6	-15.24
114.3	3.63	199.91	262.68	311.06	-16.67
115.2	3.34	202.95	265.47	314.09	-14.9
116.1	3.88	203.61	263.83	313.04	-14.33
117	3.7	202.55	265.59	312.31	-16.46
117.9	3.92	203.78	265.72	313.18	-17.23
118.8	4.63	206.17	267.33	314.57	-17.2
119.7	3.4	206.29	267.25	315.44	-14.65
120.6	4.47	206.87	267.88	314.75	-16.44
121.5	4.01	206.42	268.13	314.26	-16.88
122.4	3.57	210.36	268.66	315.19	-18.56
123.3	4.54	210.82	269.1	315.56	-18.46
124.2	2.59	209.01	271.05	314.48	-15.98
125.1	2.92	209.08	270.84	316.7	-15
126	3.27	212.88	270.83	315.27	-18.18
126.9	4.66	210.51	270.64	316.41	-15.31
127.8	2.44	213.78	273.04	316.45	-17.75
128.7	4.02	212.54	273.31	317.44	-15.72
129.6	3.67	214.6	273.41	318.08	-16.83
130.5	2.26	214.93	275.28	317.94	-16.23
131.4	3.74	214.22	273.54	319.57	-15.57
132.3	3.9	215.46	274.13	319.12	-17.87
133.2	3.23	217.49	276.01	318.44	-15.45
134.1	3.16	217.89	274.63	319.26	-16.66
135	3.09	218.22	276.32	320.92	-16.3
135.9	3.76	218.7	276.73	319.85	-15.72
136.8	2.74	218.27	278.02	320.98	-16.11
137.7	4.29	220.26	277.42	319.64	-15.11
138.6	4.27	221.97	278.13	321.52	-18.25
139.5	4.17	220.62	279.21	321.55	-16.98
140.4	2.45	221.87	280.15	321.16	-15.84
141.3	3.85	221.97	279.67	323.2	-17.29
142.2	4.7	223.46	281.12	323.2	-17.97
143.1	4.58	224.25	278.5	323.86	-16.14
144	2.43	223.53	282.07	323.26	-16.6
144.9	4.65	225.26	282.03	323.97	-17.35
145.8	3.49	226.69	281.34	325.07	-16.84
146.7	4.65	227.64	281.78	325.19	-15.43
147.6	3.08	227.48	281.73	325.43	-17.43
148.5	3.91	228.6	283.19	324.11	-17.52
149.4	2.68	228.62	283.77	325.22	-19.11
150.3	3.66	229.64	284.63	324.26	-18.08
151.2	2.07	229.94	283.94	326.82	-17.29
152.1	3.58	230.61	284.93	326.14	-18.52
153	2.23	230.78	284.44	325.46	-16.51
153.9	4.02	231.06	286.33	326.33	-18.39
154.8	5.72	232.96	285.76	326.64	-19.34
155.7	4.08	234.71	286.97	325.57	-17.72
156.6	3.71	233.7	288.38	327.51	-20.51
157.5	4.32	235.21	287.64	326.51	-19.13
158.4	2.95	236.22	288.1	328.28	-18.59
159.3	4.25	234.66	287.74	328.48	-19.77
160.2	3.71	234.98	287.83	328.75	-16.45
161.1	3.82	236.49	287.92	329.7	-20.04
162	2.5	237.06	290.92	328.87	-17.99
162.9	5.07	236.4	290.09	330.14	-18.08
163.8	4.48	240.1	290.6	329.05	-19.83
164.7	3.01	239.63	292.58	331.84	-21.08
165.6	3.22	239.42	291.65	329.06	-18.55
166.5	2.7	238.69	292.14	331.82	-18.88
167.4	4.11	241.12	292	331.06	-18.66
168.3	4.75	240.79	293.42	330.01	-16.86
169.2	3.12	241.53	292.67	330.63	-19.73
170.1	4.66	241.95	293.96	331.03	-18.23
171	1.4	242.69	296.01	331.37	-17.54
171.9	3.62	241.97	294.02	331.87	-22.64
172.8	5.35	244.81	294.64	332.15	-19.79
173.7	4.66	245.28	295.36	333.12	-20.06
174.6	4.11	245.5	295.53	330.56	-20.69
175.5	4.02	244.99	297.03	331.6	-18.39
176.4	2.97	247.47	297.3	332.62
177.3	4.78	246.63	297.91	333.93
178.2	2.85	247.15	297.82	332.52	-19.35
179.1	2.4	247.26	297.67	333.47	-17.92
180	4.99	246.69	298.08	333.63	-18.83
180.9	4.18	248.87	298.37	333.1	-18.45
181.8	2.13	249.35	299.2	334.85	-18.5
182.7	2.85	249.87	299.92	335.49	-17.73
183.6	2.81	249.78	301.51	334.5	-20.33
184.5	2.65	249.01	300.93	334.9	-18
185.4	3.98	251.3	301.36	334.73	-20.24
186.3	3.3	252.8	301.9	335.05	-21.53
187.2	3.65	252.35	301.32	334.75	-20.25
188.1	4.08	251.51	301.19	337.36	-19.17
189	3.98	252.61	302.18	335.11	-20.97
189.9	4.2	253.94	302.98	335.69	-17.43
190.8	3.45	252.46	304	336.97	-19.42
191.7	4.87	253.62	303.66	336.16	-19.2
192.6	4.28	253.89	304.34	337.16
193.5	2.97	254.56	304.24	338.2
194.4	3.97	255.37	303.96	336.48	-20.12
195.3	4.19	254.92	305.48	337.82	-19.74
196.2	4.55	255.3	307.58	338.78	-22.86
197.1	2.83	257.31	304.87	336.96	-20.15
198	2	256.62	306.5	337.99	-18.68
198.9	4.95	258.26	306.98	339.47	-17.39
199.8	2.82	256.4	307.9	338.45	-20.17
200.7	4.1	259.09	307.18	339.46	-18.09
201.6	2.33	258.04	308.69	338.84	-18.74
202.5	5.56	257.54	308.3	339.57	-22.32
203.4	3.55	259.07	307.68	339.9	-20
204.3	3.43	260.63	309.09	339.4	-22.49
205.2	2.91	260.52	308.43	339.13	-19.81
206.1	3.15	260.17	309.38	340.93	-19.03
207	1.58	259.96	310.77	339.95	-20.97
207.9	2.65	262.83	311.41	339.55	-20.43
208.8	6.33	260.31	310.12	341.54	-21.58
209.7	3.95	262.52	311.95	340.81
210.6	2.14	261.87	312.91	341.02	-19.04
211.5	2.14	262.91	311.84	341.63	-22.15
212.4	4.89	264.16	311.36	342.97	-20.72
213.3	3.85	263.75	312.49	340.87	-22.81
214.2	3.5	264.89	312.78	342.76	-23.05
215.1	1.33	263.9	313.23	342.34	-20.55
216	1.96	265.23	314.62	342.28	-21.73
216.9	1.7	266.12	313.28	343.05	-22.15
217.8	3.7	265.64	315.47	343.23	-18.96
218.7	3.87	267.29	313.01	343.17	-23.27
219.6	3.89	267.32	314.74	343.59	-22.84
220.5	4.41	266.85	315.87	344.73	-21.59
221.4	4.48	267.88	316.3	344.74	-20.89
222.3	3.12	267.93	318.16	345.09	-23.14
223.2	3.32	269.93	315.99	343.68	-19.9
224.1	4.32	269.69	317.06	344.68	-21.98
225	4.16	268.95	318.19	344.57	-21.1
225.9	3.33	268.53	317.84	346.9
226.8	3.03	269.44	318.36	345.45
227.7	4.43	268.81	319.24	346.09	-21.84
228.6	2.67	271.69	319.05	347.83	-21.8
229.5	3.53	270.66	320.9	346.96	-22.38
230.4	3.49	270.68	318.48	346.56	-22.13
231.3	2.46	272.74	320.37	345.9	-22.06
232.2	3.57	272.34	320.52	346.59	-21.81
233.1	3.74	272.72	322.27	348.11	-23.72
234	3.37	275.19	320.46	346.98	-23.29
234.9	2.57	271.82	323.01	348.14	-21.1
235.8	4.99	273.53	322.95	347.27	-21.88
236.7	3.78	274.91	321.2	348.11	-23
237.6	3.27	274.6	323.9	349.28	-22.46
238.5	2.14	274.38	322.02	348.28	-21.75
239.4	4.14	274.79	322.05	348.59	-21.52
240.3	4.52	276.46	324.68	350.26	-22.58
241.2	2	276.49	325.22	350.94	-21.7
242.1	5.27	276.9	325.48	350.72	-22.5
243	4.02	276.17	325.88	350.95
243.9	3.09	276.75	325.98	349.53	-21.96
244.8	3.32	279.64	326.03	351.16	-23.27
245.7	2.85	277.94	327.52	350.3	-21.26
246.6	4.23	280.28	327.97	351.21	-20.71
247.5	2.97	279.83	328.22	352.27	-24.38
248.4	4.06	277.64	327.46	351.08	-21.08
249.3	3.18	279.5	327.23	351.73	-21.67
250.2	3.3	280.98	327.18	352.36	-21.36
251.1	2.87	281.34	331.34	352.87	-24.99
252	3.26	281.05	329.56	353.51	-21.79
252.9	4.96	281.54	330.17	353.37	-24.66
253.8	4.09	280.68	332.48	354.77	-23.73
254.7	3.58	282.38	331.38	353.55	-25.1
255.6	4.15	283.75	331.71	355.82	-20.75
256.5	4.99	282.39	332.16	357.08	-23.72
257.4	4.39	286.06	333.53	355.4	-23.03
258.3	3.87	284.74	333.68	356.35	-23.13
259.2	3.58	284.66	334.47	355.21
260.1	4.22	285.62	335.92	355.19	-23.67
261	3.22	285.79	335.06	355.6	-21.67
261.9	4.69	287.19	335.12	355.71	-23.01
262.8	3.68	286.98	336.3	354.37	-24.84
263.7	3.84	286.8	335.85	356.85	-22.93
264.6	3.98	286.95	336.43	356.49	-24.47
265.5	2.5	288.4	336.81	356.77	-22.07
266.4	3.21	288.56	337.49	358.14	-22.69
267.3	3.7	288.83	337.9	357.01	-21.39
268.2	3.47	290.5	337.52	357.81	-23.87
269.1	3.59	288.64	340.08	357.4	-24.09
270	2.35	290.04	339.8	358.62	-22.45
270.9	3.6	292.09	339.63	357.74	-23.41
271.8	2.31	290.88	341.82	357.83	-26.03
272.7	2.52	293.2	340.32	357.53	-24.96
273.6	4.33	293.4	340.91	358.71	-23.53
274.5	2.03	293.51	341.78	359.58	-22.94
275.4	3.51	292.83	340.4	359.49
276.3	3.47	293.6	342.93	358.44	-20.5
277.2	4.05	294.44	343.62	361.59	-21.74
278.1	2.91	293.51	344.17	360.2	-24.68
279	1.96	298.07	344.83	360.99	-25.37
279.9	3.2	296.27	344.63	361.88	-24.47
280.8	3.12	297.05	344.84	360.5	-24.41
281.7	2.8	296.31	345.61	360.06	-27.7
282.6	1	298.46	345.26	360.04	-24.69
283.5	3.1	298.2	346.99	360.8	-23.89
284.4	2.29	298.93	349	362.09	-23.13
285.3	0.93	299.76	347.91	360.38	-24.76
286.2	2.06	299.59	349.13	360.11	-23.84
287.1	1.59	299.87	350.63	362.59	-24.42
288	1.96	299.74	349.29	362.48	-23.13
288.9	2.96	301.69	349.2	363.06	-23
289.8	3.78	301.54	349.81	363.32	-23
290.7	1.51	303.81	350.86	363.48	-24.35
291.6	2.24	304.69	349.7	364.9
292.5	2.61	304.16	352.36	363.16
293.4	4.17	303.5	352.28	364.7	-23.02
294.3	2.48	302.69	353.01	363.89	-23.86
295.2	2.5	304.82	353.81	365.41	-23.33
296.1	3.26	304.44	353.48	364.84	-23.78
297	3.5	304.89	353.22	365.74	-24.21
297.9	3.87	306.53	355.16	366.29	-23.8
298.8	1.92	307.87	354.06	367.16	-24.36
299.7	1.7	307.37	354.16	366.07	-26.45
300.6	3.45	307.92	356.14	367.99	-23.63
301.5	2.6	308.7	355.21	367.97	-24.71
302.4	4.54	309.22	358.07	368.79	-24.87
303.3	3.11	311.39	358.81	368.63	-25.12
304.2	2.12	309.76	356.94	369.53	-25.42
305.1	4.54	310.07	358.34	367.5	-24.07
306	3.52	311.48	358.4	370.29	-24.75
306.9	2.73	310.52	358.33	370.08	-25.52
307.8	1.87	312.13	360.05	370.26	-26.41
308.7	2.75	312.42	360.37	371.23	-23.98
309.6	3.48	313.2	360.89	372
310.5	5.06	311.87	359.81	372.13	-22.07
311.4	0.04	312.97	361.25	372.08	-25.88
312.3	1.9	313.38	362.27	372.19	-22.95
313.2	2.84	314.4	362.14	371.6	-25.01
314.1	4.69	312.97	363.52	374.36	-25.17
315	1.95	315.33	363.25	372.47	-22.79
315.9	2.45	314.89	363.4	373.82	-25.3
316.8	2.03	317.2	362.68	374.23	-21.43
317.7	3.25	316.25	365.64	375.94	-24.97
318.6	1.73	317.34	366.5	372.83	-23.84
319.5	1.06	316.34	365.46	375.8	-24.29
320.4	3.2	318.43	365.86	376.11	-24.25
321.3	4.06	319.45	366.44	378.53	-23.93
322.2	3.03	318.25	367.04	376.59	-23.99
323.1	1.08	319.16	367.32	376.07	-25.67
324	3.33	321.03	368.14	378.02	-27.39
324.9	2.61	321.12	367.14	378.04	-24.29
325.8	3.11	322	369.51	377.77
326.7	3.08	321.51	368.19	379.71	-24.97
327.6	1	322.41	371.29	380.47	-25.9
328.5	3.54	322.51	368.75	379.43	-26.59
329.4	2.53	322.4	370.24	381.79	-27.66
330.3	1.61	325.01	370.59	381.21	-23.34
331.2	2.97	324.98	372.51	379.38	-24.21
332.1	3.76	326.42	371.19	380.79	-25.02
333	1.2	325.68	372.26	380.92	-24.2
333.9	1.64	326.98	371.92	380.07	-25.13
334.8	2.04	328.41	372.43	381.09	-24.76
335.7	3.16	327.61	372.56	381.02	-25.64
336.6	2.59	327.57	371.77	379.99	-25.63
337.5	3.67	327.67	374.84	380.57	-26.99
338.4	1.54	328.37	375.18	376.24	-24.3
339.3	4.66	327.84	375.7	378.24	-23.53
340.2	2.43	330.91	374.37	377.02	-22.14
341.1	1.85	331.26	373.76	377.44	-23.67
342	1.49	331.71	375.33	376.72	-26.79
342.9	3.19	332.14	375.87	375.09	-26
343.8	2.15	334.77	376.18	375.18	-25.34
344.7	1.68	334.12	376.33	375.21	-24.25
345.6	2.08	335.06	376.17	373.05	-23.58
346.5	2.37	337.76	378.19	373.37	-24.15
347.4	3.39	337.65	378.08	372.76	-24.81
348.3	3.54	339.13	377.07	372.63	-25.06
349.2	1.87	338.65	378.4	372.72	-25.31
350.1	1.24	340.14	380.31	371.28	-25.33
351	4.77	342.44	378.6	371.73	-24.71
351.9	2.17	341.06	379.28	372.93	-24.97
352.8	2.67	342.92	381.66	373.74	-24.74
353.7	4.23	343.35	380.57	373.41	-23.44
354.6	4.6	345.47	380.36	373.19	-23.15
355.5	3.72	345.86	381.15	375.21	-24.31
356.4	2.72	346.52	384.69	371.63	-23.94
357.3	2.53	347.62	383.63	372.96	-25.21
358.2	3.66	349.78	383.76	372.96	-23.32
359.1	3.03	348.66	384.48	372.18	-24
360	3.08	348.48	383.92	372.05	-23
360.9	3.38	350.3	384.24	370.75	-23.86
361.8	2.63	351.19	384.83	371.96	-26.27
362.7	4.28	353.39	386.04	370.96	-23.3
363.6	2.93	354.48	388.86	371.6	-22.91
364.5	1.68	353.21	388.31	371.45	-25.12
365.4	1.94	355.46	387.76	372.79	-23.04
366.3	1.73	356.8	387.84	370.78	-22.22
367.2	1.62	356.6	388.89	373.63	-21.99
368.1	-0.38	357.15	390.05	373.37	-25.89
369	1	357.68	389.85	374.67	-24.01
369.9	3.6	359.52	391.44	374.63	-24.75
370.8	3.39	360.23	388.85	375.3	-23.38
371.7	2.03	359.67	390.27	376.17	-22.24
372.6	2.9	360.9	390.27	376.32	-23.48
373.5	1.8	362.75	391.77	376.34	-23.58
374.4	3.07	360.45	390.22	376.77	-22.35
375.3	2.4	362.52	392.05	378.89	-24.15
376.2	3.16	363.36	390.36	376.76	-24
377.1	3.64	364.15	391.19	378.88	-23
378	4.55	363.52	392.53	379.9	-23.06
378.9	2.72	364.81	393.31	379.49	-22.06
379.8	3.74	366.49	393.85	380.03	-25.71
380.7	4.27	366.97	394.36	380.01	-23.3
381.6	2.11	367.3	394.3	382.24	-23.2
382.5	3.42	367.38	394.24	382.22	-22.64
383.4	4.82	368.89	394.54	384.27	-24.6
384.3	3.01	369.22	394.76	385.25	-22.32
385.2	3.24	369.96	396.55	385.85	-21.97
386.1	3.47	369.32	396.07	384.98	-25.1
387	2.86	370.32	397.77	384.97	-23.45
387.9	1.53	370.88	396.85	387.83	-19.91
388.8	3.74	371.03	396.03	389.93	-22.64
389.7	5.94	372.79	401.17	388.62	-22.13
390.6	4.59	372.8	398.13	390.49	-21.92
391.5	4.47	373.36	400.43	390.33	-22.53
392.4	6.45	373.65	402.24	391.99	-22.73
393.3	3.79	376.24	400.08	394.6	-21.56
394.2	4.23	375.59	400.72	393.27	-22.11
395.1	3.81	374.56	403.41	394.75	-21.05
396	5.44	375.76	400.1	395.08	-21.47
396.9	3.3	376.41	402.94	394.93	-23.87
397.8	3.07	376.7	402.47	394.97	-21.61
398.7	5.61	375.95	402.96	396.4	-20.22
399.6	5.14	377.21	402.57	395.8	-19
400.5	5.04	376.51	402.02	396.96	-21.96
401.4	4.76	376.57	403.11	395.61	12.82
402.3			403.97		-9.73
403.2	4.15	377.07	404.36	397.7	-22.73
404.1	5.09	378.77	404.57	400.11	-29.18
405	6	380.66	407.01	399.79	-30.03
405.9		382.45	417.72	410.84	-35.28
406.8		405.74	480.1	478.9	-39.37
407.7		458.89	502.16	506	-35.19
408.6	-2.17		500.74	515.62	-40.14
409.5	-3.06		509.69	527.88	-40
410.4	-4.48		520.04	544.75	-40
411.3	-5.14		529.01	553.64	-40.61
412.2	-6.65		533.9	563.67	-42.78
413.1	-7.01		538.66	571.24	-41.86
414	-8.65		543.44	579.18	-42.11
414.9	-8.43		546.7	583.14	-41.91
415.8	-10.6		551.03	588.28	-44.68
416.7	-8.26		552.97	591.95	-41.72
417.6	-11.57		557.82	597.32	-41.56
418.5	-11.79		558.09	601.17	-42.34
419.4	-10.18		561.07	604.03	-44.25
420.3	-11.34		562.74	607.6	-43.29
421.2	-12.79		563.45	608.86	-44.99
422.1	-15.63		565	612.17	-44.37
423	-14.27		567.08	614.45	-45.82
423.9	-16.37		566.36	615.24	-45.75
424.8	-15.21		567.56	619.99	-45.41
425.7	-17.48		571.14	622.42	-44.12
426.6	-17.21		570.71	622.14	-44.68
427.5	-18.23		572.68	622.31	-44.14
428.4	-17.61		572.46	627.33	-45.84
429.3	-17.82		574.44	629.65	-47.07
430.2	-19.11		575.09	631.31	-46.49
431.1	-18.51	467.32	576.26	630.42	-46.74
432	-20.03	468.32	577.33	631.43	-45.89
432.9	-19.16	468.19	576.37	632.76	-48.02
433.8	-21.01	470.56	577.9	635.99	-47.76
434.7	-20.65		580.71	636.65	-44.82
435.6	-21.22		582.73	637.04	-46.65
436.5	-24.06		580.3	637.48	-46
437.4	-24.08	511	581.79	640.71	-46
438.3	-24.11	516.59	580.32	639.62	-47.69
439.2	-24.1	522.63	581.6	641.28	-50.72
440.1	-24.91	525.43	581.96	642.95	-48.75
441	-24.72		582.96	644.9	-49.1
441.9	-25.62		583.99	646.26	-48.68
442.8	-26.68		583.89	645.43	-46.63
443.7	-25.89		584.01	647.88
444.6	-27.42		582.54	647.2
445.5	-27.43		583.66	648.73
446.4	-27.41		584.41	648.95
447.3	-29.63		586.25	650.44
448.2	-30.84		586.89	651.24
449.1	-31.19		580.24	649.27	102.4
450	-32.74		585.94	652.99	-0.6
450.9	-32.83		585.93	651.67	0.16
451.8	-31.83		586.72	653.29	-3
452.7	-31.24		587.49	655.76	-3
453.6	-33.77		587.42	655.23	-3
454.5	-32.47		587.37	656.17	-4
455.4	-34.24	584.83	585.82	657.84	-4
456.3	-32.35	588.94	587.81	657.17	-4
457.2	-34.87	594.15	587.41	658.64	-5
458.1	-34.83	596.85	587.13	658.54	-5.15
459	-35.71	598.39	587.82	657.81	-4.42
459.9	-36.88	599.94	587.25	658.59	-5.83
460.8	-35.29	602	586.36	661.99	-4.16
461.7	-35.96	605.57	588.64	663.05	-5.72
462.6	-39.08	607.48	588.69	659.56	-2.78
463.5	-38.97	608.41	587.97	661.06	-9.06
464.4	-39.89	608.79	589.95	661.63	-7.57
465.3	-39.61	610.76	588.99	660.96	-8.87
466.2	-39.11	611.77	589.48	663.61	-5.65
467.1	-39.65	613.93	588.32	664.14	-8.12
468	-42.39	614.34	588.82	663.8	-9.22
468.9	-41.59	616.3	589.34	663.75	-8.62
469.8	-39.96	616.9	588	664.62	-8.01
470.7	-42.63	619.49	588.69	666.27	-7.87
471.6	-41.74	616.99	589.51	664.97	-6.59
472.5	-43.71	619.03	588.35	667.48	-10.11
473.4	-42.19	619.31	587.95	667.31	-8.53
474.3	-45.48	619	589.38	667.07	-7.55
475.2	-43.67	620.4	589.43	667.86	-8.49
476.1	-45.79	620.76	590.24	667.39	-5.41
477	-44.59	622.58	589.49	669.04	-6.3
477.9	-46.26	621.23	589.9	668.95	-8.4
478.8	-47.21	622.76	589.16	669.53	-6.95
479.7	-47.59	623.42	591.08	669.91	-9
480.6	-47.39	624.93	589.64	670.71	-8.83
481.5	-45.93	624.87	590.27	671.55	-8.15
482.4	-48.3	625.35	589.71	672.22	-7.11
483.3	-50.35	624.99	589.43	671.81	-5.08
484.2	-50.71	624.22	590.03	670.56	-4.95
485.1	-51.65	627.45	589.81	670.48	-6.84
486	-48.29	627.15	590.34	671.79	-6.69
486.9	-50.96	627.34	589.43	672.64	-5.18
487.8	-50.61	629.86	589.51	673.24	-7.49
488.7	-51.37	629.19	590.93	674.82	-6.88
489.6	-51.08	629.41	589.98	674	-7.8
490.5	-52.59	628.97	589.36	672.56	-5.86
491.4	-53.2	629.88	590.64	674.55	-8.41
492.3	-52.83	630.13	589.59	673.78	-7.1
493.2	-53.74	629.83	591.88	673.04	-5.3
494.1	-53.46	631.29	589.73	673.65	-5.19
495	-53.9	630.1	590.78	675.79	-8.54
495.9	-53.64	631.92	590.98	674.43	-7.34
496.8	-55.48	632.06	591.38	674.11	-7.02
497.7	-56.06	631.35	590.21	673.44	-7.72
498.6	-54.99	631.85	590.24	677.23	-6.81
499.5	-59.07	632.63	591.74	674.31	-7.3
500.4	-57.11	631.56	592.74	673.96	-6.63
501.3	-58.65	633.52	589.87	673.26	-8.29
502.2	-57.27	634.03	591.79	674.08	-7.04
503.1	-59.45	632.88	591.36	672.31	-6.51
504	-59.93	634.08	589.9	673.82	-9.45
504.9	-60.26	633.91	590.42	672.65	-6.46
505.8	-60.13	634.19	589.13	672.81	-5.37
506.7	-59.77	633.76	592.11	674.38	-9.06
507.6	-60.7	634.29	590.57	673.74	-9.61
508.5	-61.84	634.28	591.48	673.49	-9.36
509.4	-60.31	635.81	590.99	674.35	-10.51
510.3	-61.82	635.11	591.48	674.64	-10.42
511.2	-61.26	634.92	590.54	675.42	-6.2
512.1	-62.31	635.6	589.31	677.42	-11.26
513	-63.5	635.14	589.9	677.7	-11.91
513.9	-64.56	637.09	591.65	677.81	-12.66
514.8	-63.7	636.34	589.43	674.36	-13.24
515.7	-65.27	637.38	590.12	675.53	-8.89
516.6	-64.4	636.85	590.65	675.86	-9.89
517.5	-65.59	636.96	588.47	675.36	-11.36
518.4	-67.83	636.7	588.59	676.05	-11.77
519.3	-65.28	637.26	591	675.51	-12.46
520.2	-67.46	638.68	589.66	675.18	-10.84
521.1	-67.93	639.11	592.02	676.87	-11.52
522	-69.25	637.11	589.1	675.97	-9.68
522.9	-68.37	637.6	590.54	677.11	-11.22
523.8	-71.51	637.3	589.67	677.21	-11.76
524.7	-69.52	637.9	590.04	678.47	-14.46
525.6	-69.96	638.59	590.24	679.26	-13.52
526.5	-71	637.36	590.24	679.92	-12.52
527.4	-70.33	639.34	591.64	682.42	-12.16
528.3	-70.5	639.32	590.3	681.33	-14.79
529.2	-71.7	638.19	590.52	681.42	-13.81
530.1	-71.56	638.12	589.5	681.86	-11.29
531	-71.45	638.37	589.46	680.98	-13.76
531.9	-72.28	638.74	589.45	680.8	-12.2
532.8	-73.24	639.02	590.02	682.76	-11.4
533.7	-74.42	639.48	588.96	681.76	-14.12
534.6	-75.1	638.25	590.11	683.22	-12.88
535.5	-74.77	639.78	590.91	684.57	-10.99
536.4	-74.48	640.49	589.89	682.67	-12.87
537.3	-74.99	640.2	590.58	682.63	-14.04
538.2	-74.84	639.74	590.85	683.12	-9.62
539.1	-74.65	638.86	590.66	685.49	-14.79
540	-76.48	638.24	591.22	684.99	-13.92
540.9	-76.56	641.57	592.03	685.23	-11.01
541.8	-76.5	640.13	591.9	686.68	-13.32
542.7	-76.22	640.47	590.96	687.64	-13.92
543.6	-77.5	639.3	591.23	688.94	-13.81
544.5	-76.29	639.8	591.91	687.38	-13.64
545.4	-78	638.99	593.24	688.86	-13.84
546.3	-79.01	642.22	590.11	690.23	-13.5
547.2	-77.38	641.02	593.24	689.83	-13.17
548.1	-78.87	641.21	590.81	691.15	-12.4
549	-79.6	641.54	593.89	691.21	-12.98
549.9	-79.8	641.6	593.1	691.68	-11.65
550.8	-78.81	639.95	592.87	691.78	-13.56
551.7		640.19	593.8	693.06	-15.34
552.6	-79.47	640.93	594.55	694.15	-17.04
553.5			594.06	694.75	-14.23
554.4		641.94	593.22	693.2	-14.73
555.3			569.92		-15.52
556.2			575.1		-13.86
557.1		635.11	580.3		-16.54
558	-76.4	628.91	577.46	693.16	-16.04
558.9	-69.02	625.49	573.95	690.1	-15.34
559.8	-66.13	621.11	570.8	688.83	-16.02
560.7	-68.5	620.6	569.31	686.24	-15.88
561.6	-66.97	618.81	567.16	682.56	-16.65
562.5	-67.29	617.54	563.64	680.63	-15.99
563.4	-64.29	616.81	561.61	677.54	-16.79
564.3	-66.46	617.17	559.91	675.93	-14.19
565.2	-65.2	614.3	559.5	672.06	-14.79
566.1	-65.25	613.07	558.25	669.92	-14.18
567	-65.26	612.12	556.94	670.81	-16.4
567.9	-62.91	610.98	554.67	669.64	-15.64
568.8	-65.03	609.1	554.61	667.45	-15.93
569.7	-63.16	610.4	552.24	666.27	-15.66
570.6	-63.83	608.88	552.48	662.38	-15.25
571.5	-61.93	608.22	549.01	661.45	-18.06
572.4	-61.74	608.38	549.34	661.08	-16.11
573.3	-60.28	607.13	547.99	659.78	-16.05
574.2	-61.25	606.84	546.63	657.86	-16.17
575.1	-60.5	604.94	545.16	656.54	-15.38
576	-60.1	604.16	546.25	658.39	-16.13
576.9	-59.27	604	544.86	655.34	-15.34
577.8	-60.04	603.15	543.03	652.41	-16.43
578.7	-61.07	602.94	541.08	652.67	-16.89
579.6	-58.83	601.46	539.81	651.94	-15.42
580.5	-60.22	603.66	540.14	651.94	-16.16
581.4	-59.24	601.78	538.83	651.62	-16.83
582.3	-58.35	601.25	538.24	648.04	-18.81
583.2	-58.53	601.61	538.32	648.03	-16.68
584.1	-58.94	600.14	536.5	646.34	-14.02
585	-57.83	600.3	536.71	647.63	-15.79
585.9	-58.45	600.25	535.87	645.17	-16.15
586.8	-58.16	598.9	533.38	645.09	-16.41
587.7	-57.37	599.62	535.21	644.1	-13.46
588.6	-56.78	599.83	533.1	641.46	-17.34
589.5	-55.98	598.46	533.14	641.83	-14.74
590.4	-55.92	597.28	532.19	640.28	-15.35
591.3	-56.36	597.41	529.75	641.52	-17.74
592.2	-57.49	597.9	531.32	638.81	-18.74
593.1	-56.3	597.01	528.86	637.42	-17.46
594	-55.32	598.52	528.81	637.9	-16.63
594.9	-54.79	596.5	529.51	637.06	-17.61
595.8	-56.36	596.32	528.09	635.85	-16.81
596.7	-54.15	596.88	527.8	633.17	-18.14
597.6	-54.37	596.54	525.63	632.96	-16.28
598.5	-55.04	596.47	526.18	633.69	-18.86
599.4	-52.31	595.68	526.63	631.36	-19.38
600.3	-55.12	595.24	525.15	629.95	-18.78
601.2	-52.57	594.41	524.99	632.03	-18.25
602.1	-53.73	596.36	522.77	629.02	-20.38
603	-54.3	594.31	523.43	629.95	-17.12
603.9	-52.18	594.53	523.28	628.52	-20.99
604.8	-52.79	593.7	522.32	626.26	-19.99
605.7	-53.18	593.96	522.14	627.28	-19.31
606.6	-53.85	592.06	521.11	625.12	-19.8
607.5	-52.48	594.94	520.25	627.04	-18.48
608.4	-53.33	592.16	520.27	625.48	-20.46
609.3	-51.55	591.87	518.95	626.42	-21.24
610.2	-50.69	593.33	518.65	624.6	-18.62
611.1	-50.25	591.79	519.76	623.38	-21.8
612	-52.23	591.94	518.89	624.25	-19.32
612.9	-52.05	591.51	517.95	620	-18.12
613.8	-51.58	591.16	518.09	620.94	-20.05
614.7	-53.06	591.64	517.01	620.97	-20.55
615.6	-50.69	589.95	516.01	619	-18.81
616.5	-51.58	589.24	516.35	619.27	-21.25
617.4	-48.52	589.41	514.96	619.36	-18.49
618.3	-50	589.48	514.94	618.14	-20.19
619.2	-49.94	589.48	513.79	617.94	-21.7
620.1	-50.02	591.58	514.5	616.45	-19.55
621	-47.8	588.93	513.65	616.93	-17.87
621.9	-48.56	588.45	512.38	617.64	-23.3
622.8	-50.12	589.81	512.06	615.26	-22
623.7	-49.35	588.98	513.06	614.58	-20.27
624.6	-48.42	589.63	510.32	615.07	-22.02
625.5	-49.49	588.66	511.59	612.66	-22.42
626.4	-47.26	588.61	510.2	614.56	-19.21
627.3	-48.81	587.53	509.88	612.42	-21.31
628.2	-48.34	587.35	509.65	610.15	-21.86
629.1	-48.1	586.94	509.59	611.02	-21.84
630	-48.07	587.45	509.89	612.98	-22.05
630.9	-48.66	586.44	506.54	610.62	-20.75
631.8	-48	586.69	508.91	610.05	-19.74
632.7	-47.76	585.82	506.77	610.95	-20.87
633.6	-47.72	584.77	506.95	608.25	-22.95
634.5	-48.72	585.79	508.31	609.73	-20.61
635.4	-47.62	582.85	506.51	607.52	-22.03
636.3	-47.5	585.25	506.4	607.17	-22.52
637.2	-47.5	583.14	505.83	606.26	-22
638.1	-45.89	584.14	505.47	604.62	-22.35
639	-47.29	583.18	505.6	604.86	-24
639.9	-46.28	583.13	506.09	605.08	-20.19
640.8	-46.18	583.67	504.42	604.46	-22.15
641.7	-45.67	582.82	502.77	602.72	-22.25
642.6	-45.56	582.32	503.85	603.08	-23.04
643.5	-46.16	583.73	503.21	604.75	-22.38
644.4	-44.18	583.68	502.77	603.34	-21.78
645.3	-44.09	583.14	502.18	602.66	-24.26
646.2	-44.59	582.67	503.6	601.3	-24.52
647.1	-45.71	580.88	500.88	602.19	-23.26
648	-45.43	582.28	501.7	600.26	-23.28
648.9	-45.38	581.63	500.8	600.36	-22.4
649.8	-43.82	583.18	501.49	599.81	-22.72
650.7	-43.1	579.74	501.59	599.66	-23.75
651.6	-42.96	579.22	500.09	598.48	-22.79
652.5	-44.78	579.94	500.05	598.68	-23.69
653.4	-45.3	579.76	499.13	597.93	-24.65
654.3	-44.81	580.16	499.36	596.9	-24.77
655.2	-44.31	580.23	499.16	596.45	-22.52
656.1	-42.87	580.31	499.52	596.99	-22.32
657	-44.56	582.04	498.95	596.47	-23.28
657.9	-42.25	580.53	498.13	596.63	-23.18
658.8	-44.61	580	497.9	594.66	-24.82
659.7	-43.65	579.19	498.05	594.26	-23.55
660.6	-44.6	579.06	497.22	594.8	-23.31
661.5	-41.8	578.84	496.34	593.7	-24.5
662.4	-41.98	578.89	496.14	593.73	-24.99
663.3	-42.39	578.71	496	592.8	-24.01
664.2	-43.83	578.03	494.97	591.69	-27.71
665.1	-41.92	578.32	494.31	593.51	-25.14
666	-43.09	577.17	494.64	591.57	-24.63
666.9	-41.76	577.47	494.33	591.38	-24.05
667.8	-40.53	578.01	495.03	592.46	-24.58
668.7	-42.55	577.36	492.54	589.76	-24.82
669.6	-44.05	577.08	493.52	589.37	-26.31
670.5	-43.04	576.56	493.61	589.47	-26.02
671.4	-43.09	575.57	494.08	589.31	-25.14
672.3	-42.27	576.91	493.08	590.07	-26.48
673.2	-40.26	576.97	493.05	587.5	-22.66
674.1	-41.77	577.65	491.73	587.54	-27.05
675	-40.8	574.12	492.16	587.23	-26.19
675.9	-40.67	576.01	489.33	588.08	-26.48
676.8	-39.77	575.73	491.94	587.74	-24.01
677.7	-41.81	574.95	490.45	586.19	-26.67
678.6	-39.9	575.52	491.8	586.5	-27.2
679.5	-39.34	575.49	492.58	584.78	-26.61
680.4	-40.24	572.4	491.45	586.25	-28.71
681.3	-40.12	574.44	489.4	585.84	-25.93
682.2	-39.88	577.25	489.28	584.46	-25.48
683.1	-39.54	574.86	490.82	583.67	-27.77
684	-38.88	573.5	487.79	585.35	-29.23
684.9	-39.96	573.71	489.25	583.18	-25.48
685.8	-37.69	575.42	490.15	583.39	-26.86
686.7	-39.35	574.75	488.41	582.93	-29.48
687.6	-37.9	573.99	487.23	581.89	-26.43
688.5	-38.96	573.72	490.02	580.14	-26.38
689.4	-39.75	573.37	489.4	579.95	-25.4
690.3	-39.1	572.94	487.68	581.7	-27.93
691.2	-37.99	572.41	486.3	580.97	-24.58
692.1	-40.22	572.24	487.68	581.31	-26.91
693	-38.73	572.92	486.59	580.48	-27.04
693.9	-39.38	571.87	484.83	579.59	-25.92
694.8	-38.82	572.52	488.61	580.19	-27.43
695.7	-38.48	571.38	485.46	579.65	-28.06
696.6	-37.55	570.98	487.12	577.73	-25.62
697.5	-37.96	570.76	486.05	578.16	-28.46
698.4	-36.71	571.43	485.18	578.62	-25.45
699.3	-37.07	571.95	484.89	579.41	-26.17
700.2	-36.89	570.37	485.36	576.79	-26.82
701.1	-37.86	571.42	484.96	576.22	-28.73
702	-37.3	569.26	484.57	577.61	-26.87
702.9	-37.52	570.6	483.32	576.89	-27.33
703.8	-37.41	569.91	483.31	576.46	-29.4
704.7	-37.97	569.8	483.23	576.4	-27.26
705.6	-36.41	570.78	481.19	574.53	-26.45
706.5	-37.57	571.11	482.37	573.6	-29.44
707.4	-36.71	570.36	483.63	573.82	-23.92
708.3	-36.95	568.63	483.13	573.33	-28.38
709.2	-36.99	569.69	483.77	573.74	-27.05
710.1	-37.33	569.76	482.08	573.58	-29.02
711	-36.07	570.8	481.18	574.22	-26.74
711.9	-35.22	568.29	481.19	573.13	-29.59
712.8	-36.79	570.47	482.29	572.62	-30.06
713.7	-35.67	568.15	481.35	572.12	-28.81
714.6	-35.93	569.81	481.44	571.86	-30.57
715.5	-36.7	568.95	480.31	571.85	-27.58
716.4	-35.8	568.27	479.21	570.87	-27.81
717.3	-37.37	568.43	480.7	571.64	-27.39
718.2	-35.52	568.29	481.33	570.32	-29.6
719.1	-33.81	569.59	479.37	571.46	-27.68
720	-34.89	567.25	478.14	570.85	-27.81
720.9	-35.59	569.67	479.6	570.41	-28.19
721.8	-36.31	566.92	480.56	569.14	-30.15
722.7	-35.81	567.63	478.01	568.86	-29.14
723.6	-34.21	568.26	479.23	568.23	-28.94
724.5	-35.41	566.91	479.02	569.76	-26.24
725.4	-34.05	569.49	478.24	567.4	-29.25
726.3	-34.56	565.53	478.7	566.3	-28.69
727.2	-34.61	567.78	478.61	569.06	-28
728.1	-34.17	568.29	478.67	568.48	-26.57
729	-34.87	566.53	477.98	565.72	-30.48
729.9	-34.5	567.13	477.86	565.33	-30.03
730.8	-34.98	564.26	477.96	565.54	-30.19
731.7	-33.71	567.27	476.98	565.24	-30.13
732.6	-34.71	567.26	476.48	566.12	-29.88
733.5	-33.91	566.81	477.47	566.73	-27.32
734.4	-33.89	567.05	476.95	565.61	-26.61
735.3	-33.58	564.77	474.4	565.56	-30.4
736.2	-34.68	567.97	475.5	564.86	-29.44
737.1	-33.12	566.05	475.22	564.45	-26.18
738	-35.63	564.77	474.52	563.77	-27.83
738.9	-31.91	565	474.67	563.04	-26.85
739.8	-34.27	564.62	475.12	563.37	-26.43
740.7	-34.33	565.63	475.26	562.89	-28.32
741.6	-32.12	565.62	473.26	560.8	-28.55
742.5	-32.51	564.8	474.38	562.94	-28.62
743.4	-32.53	563.68	474.43	562.27	-27.64
744.3	-34.13	565.32	474.01	561.76	-29.18
745.2	-33.9	564.51	473.9	561.73	-28.81
746.1	-33.15	565.11	472.79	562	-26.72
747	-30.98	564.11	473.41	560.58	-28.08
747.9	-31.8	564.45	473.69	560.21	-29.2
748.8	-30.92	563.56	473.89	559.85	-27.98
749.7	-32.55	564.25	471.89	560.94	-30.73
750.6	-33.87	563.16	472.6	559.55	-32.27
751.5	-31.96	562.16	472.54	559.05	-28.6
752.4	-31.56	564.22	471.39	559.85	-31.39
753.3	-34	563.6	470.87	558.53	-29.57
754.2	-32.02	561.81	471.44	557.55	-29.96
755.1	-32.73	562.52	470.95	558.79	-30.84
756	-30.3	563.76	471.79	557.44	-26.65
756.9	-33.1	562.69	471.54	559.48	-29.47
757.8	-32.97	562.07	470.41	556.21	-30.03
758.7	-29.72	563.7	471.21	557.9	-28.11
759.6	-31.59	562.2	470.68	556.36	-29.15
760.5	-31.9	563.33	471.47	557.23	-27.84
761.4	-32.63	562.34	469.69	556.49	-29.26
762.3	-31.98	561.49	470.15	556.88	-27.6
763.2	-29.63	561.65	469.58	555	-29.27
764.1	-32.71	561.38	470.67	555.65	-28.74
765	-29.52	560.4	468.75	555.78	-27.32
765.9	-31.45	561.54	467.69	554.75	-28.93
766.8	-29.34	561.41	469.57	555.06	-26.96
767.7	-30.95	560.05	469.32	556.52	-28.23
768.6	-30.39	561.32	467.98	554.44	-28.12
769.5	-29.97	560.56	468.47	556.17	-27.74
770.4	-29.56	560.72	469.99	553.78	-28.59
771.3	-31.13	560.67	468.25	554.48	-28.82
772.2	-30.16	560.01	468.57	554.06	-29.15
773.1	-30.63	561.54	466.87	555	-29.01
774	-29.41	560.3	467.82	552.16	-29.88
774.9	-28.95	560.76	467.95	551.57	-28.57
775.8	-28.54	560.76	468.4	551.76	-30.21
776.7	-29.08	559.08	467.1	551.46	-30.37
777.6	-29.74	559.64	466.02	551.89	-31.83
778.5	-28.13	558.62	467.3	552.05	-31.42
779.4	-29.63	559.67	468.52	550.05	-31.9
780.3	-28.59	558.21	467.7	550.32	-26.67
781.2	-30.2	559.21	465.88	551.67	-30.4
782.1	-29.28	557.54	466.99	550.75	-28.94
783	-28.2	558.27	467.01	550.55	-28.45
783.9	-29.09	558.25	466.67	549.64	-28.44
784.8	-28.02	557.9	466.44	549.2	-29.74
785.7	-27.26	558.53	465.53	548.43	-29.26
786.6	-29.97	558.06	464.57	548.98	-30.22
787.5	-26.86	559.46	465.92	549.58	-29.75
788.4	-28.61	558.55	466.27	550.68	-27.84
789.3	-28.05	559.28	464.14	548.96	-28.44
790.2	-27.98	557.15	465.2	547.27	-28.72
791.1	-27.16	558.14	464.34	548.27	-29.08
792	-28	557.5	464.2	548.79	-30.88
792.9	-27.14	557.82	464.03	548.93	-27.9
793.8	-26.89	557.61	463.24	547.83	-29.01
794.7	-28.05	557.94	464.06	547.65	-30.07
795.6	-29	558.71	463.82	545.83	-29.9
796.5	-28.12	556.15	464.55	549.66	-29.19
797.4	-27.89	557.09	462.54	546.68	-28.12
798.3	-29.07	555.87	463.46	546.71	-30.22
799.2	-27.18	558.01	461.3	544.8	-28.86
800.1	-27.62	558.9	461.82	547.63	-28.28
801	-26.73	555.98	461.68	545.59	-28.35
801.9	-27.19	558.36	461.54	547.3	-30.07
802.8	-29.61	556.65	463.88	546.43	-29.74
803.7	-27.7	557.91	462.03	543.3	-27.89
804.6	-26.54	557.43	462.19	544.67	-28.37
805.5	-27.65	556.62	461.01	544.91	-28.21
806.4	-24.11	556.33	460.88	544.04	-27.81
807.3	-26.87	555.92	460.91	544.26	-29.98
808.2	-27.09	556.31	460.81	544.22	-27.58
809.1	-27.14	557.37	460.57	544.58	-29.05
810	-27.44	556.49	461.66	542.63	-27.45
810.9	-26.69	555.09	460.28	542.73	-28.72
811.8	-26.18	555.66	460.74	543.55	-29.59
812.7	-26.94	556.12	460.9	542.6	-29.08
813.6	-25.8	555.6	459.47	541.77	-28.17
814.5	-26.47	555.32	458.86	544.23	-30.6
815.4	-27.21	553.67	459.38	542.57	-26.76
816.3	-25.65	555.89	458.68	541.51	-27.77
817.2	-26.43	555.35	459.04	543.44	-27.22
818.1	-27.04	554.71	459.82	541.61	-29.09
819	-25.32	556.25	460.52	540.75	-30.67
819.9	-26.06	554.28	458.93	539.6	-28.4
820.8	-26.2	554.99	460.29	541.47	-26.39
821.7	-25.1	554.22	458.49	540.92	-28.77
822.6	-24.03	554.24	457.54	541.3	-27.52
823.5	-24.39	554.77	459.67	540.95	-27.59
824.4	-25.3	554.12	459.37	540.04	-28.65
825.3	-24.75	555.61	458.35	539.76	-27.53
826.2	-25.75	554.45	456.5	539.86	-29.79
827.1	-25.25	553.13	458.52	539.78	-29.8
828	-26.1	554.02	457.82	539.17	-31.6
828.9	-26.23	553.89	456.69	539.16	-28.34
829.8	-25.65	554.22	458.06	539.38	-30.88
830.7	-23.48	552.9	458.43	538.86	-28.95
831.6	-25.18	552.79	457.37	538.28	-29.13
832.5	-25.66	552.23	458.56	538.57	-28.31
833.4	-24.46	553.29	457.1	537.88	-29.02
834.3	-24.34	554.21	457.39	538.69	-28.77
835.2	-23.71	553.09	456.85	539.13	-26.88
836.1	-26.37	553.47	455.9	537.49	-31.14
837	-24.96	552.28	457.17	537.81	-29.97
837.9	-26.35	553.38	455.9	536.85	-28.16
838.8	-25.6	552.54	457.34	536.98	-31.46
839.7	-24.29	553.55	456.18	537.8	-27.81
840.6	-23.81	553.19	456.7	536.45	-28.31
841.5	-24.4	552.79	454.73	535.11	-27.5
842.4	-24.61	552.7	454.91	535.54	-30.29
843.3	-25.33	552.72	456.15	535.69	-27.84
844.2	-23.84	551.85	455.28	536.64	-28.5
845.1	-24.76	549.61	456.04	534.68	-27.05
846	-24.46	552.34	453.96	534.89	-27.18
846.9	-24.93	552.1	452.69	534.13	-26.96
847.8	-24.12	550	453.72	536.23	-26.43
848.7	-22.74	550.41	457.08	535.03	-26.04
849.6	-25.58	551.32	454.15	535.57	-26.68
850.5	-24.87	552.81	454.07	533.26	-25.08
851.4	-23.42	551.84	453.3	533.7	13.57
852.3	-24.8	552.14	452.87	533.53	-12.16
853.2	-23.55	550.89	453.2	534.9	-25.99
854.1	-23.59	550.64	454.8	533.74	-34.18
855	-23.51	551.7	453.84	531.92	-32.57
855.9	-24.42	548.28	452.6	532.85	-39.49
856.8	-23.92	551.23	452.87	532.9	-38
857.7	-22.82	551.46	453.67	532.33	-37.73
858.6	-22.36	550.53	453.52	531.49	-47.85
859.5	-25.29	550.42	454.97	531.86	-87.54
860.4	-25.15	550.59	453.4	531.89	-88.82
861.3	-23.89	549.75	451	532.65	-92.27
862.2	-22.19	551.76	451.54	531.42	-90.43
863.1	-23.96	550.17	453.07	531.53	-91
864	-23.14	550.47	453.24	530.33	-92.54
864.9	-23.55	550.32	452.54	531.03	-88.63
865.8	-23.98	549.25	451.47	530.5	-88.18
866.7	-23.83	548.88	451.24	531.21	-86
867.6	-24.34	549.46	451.76	532.19	-83.46
868.5	-23.29	548.47	449.86	528.59	-85.29
869.4	-21.73	548.61	450.33	529.62	-82.96
870.3	-23.69	549.05	449.74	530.12	-83.2
871.2	-22.72	548.71	451.67	529.24	-82.43
872.1	-23.09	549.5	450.72	528.63	-80.72
873	-23.04	548.15	450.72	529.48	-81.78
873.9	-20.72	549.08	449.94	528.56	-79.84
874.8	-21.79	548.65	450.57	529.17	-79.92
875.7	-23.86	548.28	449.29	529.49	-76.71
876.6	-22.56	548.17	449.24	529.2	-76.85
877.5	-22.59	548.91	451.53	528.99	-75.91
878.4	-21.44	548.34	449.28	529.04	-77.69
879.3	-22.5	548.13	450	529.16	-79.75
880.2	-23.62	549.11	448.9	527.97	-77.63
881.1	-23.07	547.91	448.15	527.42	-76.9
882	-21.28	546.84	449.27	529.04	-75.4
882.9	-22.45	548.68	448.16	527.13	-78.18
883.8	-19.5	548.55	449	526.66	-77.73
884.7	-24.01	548	448.16	527.86	-76.27
885.6	-22.01	546.08	448.92	528.25	-77
886.5	-21.59	548.04	448.46	529.44	-79.97
887.4	-21.69	545.39	449.02	526.29	-76.66
888.3	-22.65	547.64	448.89	527.69	-77.92
889.2	-23.51	547.73	449.25	527.03	-77.83
890.1	-22.32	547.65	448.74	526.76	-78.92
891	-21.2	548.36	445.99	526.29	-78.35
891.9	-20.91	548.33	447.53	525.18	-78.18
892.8	-22.96	547.29	448.72	527.8	-76.64
893.7	-23.51	547.24	446.07	526.42	-77.24
894.6	-21.01	547.49	447.54	524.76	-76.82
895.5	-20.94	546.02	447.54	525.67	-75.21
896.4	-21.46	545.98	445.66	525.13	-77.38
897.3	-21.27	547.78	447.44	524.79	-74.35
898.2	-22.22	545.79	448.55	523.31	-76.15
899.1	-19.89	547.44	446.06	526.49	-80.09
900	-22.34	545.31	447.34	524.05	-77.25
900.9	-21.14	545.93	444.97	523.99	-76.9
901.8	-21.39	544.95	446.2	524.87	-76.88
902.7	-21.27	546.06	448.1	524.29	-77.69
903.6	-22.19	546.94	445.73	523.75	-77
904.5	-21.91	545.93	445.91	522.74	-78.71
905.4	-22.18	544.48	446.03	523.86	-76.49
906.3	-22.22	545.12	446.58	522.95	-76.77
907.2	-20.33	546.8	445.61	524.88	-77.03
908.1	-20.42	544.25	446.16	522.33	-77.34
909	-20.87	544.94	445.41	524.46	-79.36
909.9	-22.65	545.94	443.71	521.49	-77.17
910.8	-20.84	544.84	445.02	522.71	-77
911.7	-21.38	544.96	444.8	522.65	-78.51
912.6	-21.44	544.22	446.04	523.24	-78.51
913.5	-21.94	544.2	444.28	521.45	-78.51
914.4	-21.34	546.9	445.07	521.1	-78.51
915.3	-20.39	543.25	445.02	521.64	-78.51
916.2	-20.52	543.51	445.5	521.93	-76.09
917.1	-21.06	544.49	443.49	519.26	-76.09
918	-22.2	544.74	442.74	519.01	-80.36
918.9	-22.22	544.33	444	521.28	-76.28
919.8	-21.25	544.23	444.2	520.74	-76.09
920.7	-20.88	544.23	443.85	520.89	-78.08
921.6	-21.4	544.47	443.61	519.62	-78.35
922.5	-21.29	545.4	443.06	520.71	-82.57
923.4	-20.53	543.1	444.51	520.51	-79.51
924.3	-21.18	543.41	442.18	519.76	-79.51
925.2	-19.7	542.46	444.11	521.84	-79.51
926.1	-19.46	543.95	441.39	519.8	-78.03
927	-20.24	545.29	444.22	517.89	-76.28
927.9	-20.89	543.65	442.44	517.24	-76.28
928.8	-20.7	542.57	441.06	519	-77.56
929.7	-19.95	543.41	442.13	518.54	-80.19
930.6	-20.58	543.23	442.12	520.24	-80.19
931.5	-21.46	545.01	442.32	519.82	-80.19
932.4	-19.89	543.73	442.35	519.24	-79.09
933.3	-19.69	544.48	441.46	519.48	-78.47
934.2	-18.92	542.98	441.84	518.94	-77.97
935.1	-20.4	543.92	441.21	518.55	-77.97
936	-20.07	543.2	440.6	517.86	-77.97
936.9	-21.1	543.21	441.71	517.44	-80.25
937.8	-20.32	542.83	441.25	518	-77.97
938.7	-19.97	542.17	442.83	516.69	-79.38
939.6	-20.83	543.21	439.27	516.36	-78.58
940.5	-19.09	541.39	440.84	516.11	-77.97
941.4	-19.35	541.57	441.48	517.58	-77.69
942.3	-19.7	541.18	440.67	516.52	-79.49
943.2	-21	541.62	440.55	514.37	-79.49
944.1	-19.75	540.86	439.73	514.59	-79.42
945	-18.06	542.65	440.97	517.96	-77.46
945.9	-19.53	543.57	439.58	517	-77.72
946.8	-18.67	540.64	440.1	514.32	-77.72
947.7	-19.33	541.59	440.58	515.13	-80.55
948.6	-19.18	540.99	438.31	515.6	-79.39
949.5	-18.1	542.98	438.96	516	-77.72
950.4	-19.26	541.79	440.6	516.62	-78.56
951.3	-18.45	542.13	438.48	515.42	-77.84
952.2	-18.82	544.16	438.96	513.96	-77.72
953.1	-18.78	541.53	440.52	514.91	-77.72
954	-22.27	542.62	440.16	514.05	-81.44
954.9	-20.11	541.39	439.95	514.47	-77.58
955.8	-18.5	540.59	440.06	513.32	-77.72
956.7	-20.28	541.49	439.28	514.68	-78.92
957.6	-18.74	540.8	438.34	514.6	-77.08
958.5	-17.2	541.31	439.55	513.66	-77.72
959.4	-18.86	541.06	439.72	513.53	-79.58
960.3	-19.01	538.49	438.36	515.31	-78.47
961.2	-18.67	540.08	439.82	513.35	-77.87
962.1	-18.85	539.93	439.26	514.27	-77.72
963	-18.67	541.22	438.15	514.24	-79.26
963.9	-17.97	540.11	438.55	514.22	-80.03
964.8	-18.95	541.19	437.35	511.46	-77.72
965.7	-18.96	541.41	438.54	511.19	-78.82
966.6	-18.43	539.28	438.85	512.18	-79.33
967.5	-19.17	539.46	438.19	514.45	-78.09
968.4	-18.69	539.68	437.38	511.94	-77.72
969.3	-18.33	539.14	438.12	513.34	-79.5
970.2	-18.87	541.29	435.67	514.46	-81.69
971.1	-18.43	540.5	438.16	512.14	-80.73
972	-19.33	538.72	436.2	511.27	-77.72
972.9	-19.27	541.06	436.82	512.16	-78.5
973.8	-20.25	538.58	436.68	511.51	-78.95
974.7	-17.12	539.07	435.35	511.68	-77.72
975.6	-18.7	538.99	436.31	510.26	-79.39
976.5	-19.03	539.02	435.98	510.66	-80.06
977.4	-17.86	538.62	436.85	511.52	-77.72
978.3	-17.56	540.1	435.34	510.77	-79.61
979.2	-16.83	537.96	437	510.31	-80.6
980.1	-17.67	539.2	435.86	509.82	-79.4
981	-16.98	538.93	435.87	510.01	-79.4
981.9	-18.65	540.68	434.93	509.44	-78.5
982.8	-17.43	538.81	435.54	509.66	-79.4
983.7	-17.17	538.95	435.78	511.1	-79.46
984.6	-20.03	537.54	434.55	510.87	-80.29
985.5	-17.71	539.77	436.36	510.42	-77.02
986.4	-19.28	538.05	435.03	508.51	-77.02
987.3	-18.07	538.94	434.59	509.94	-77.34
988.2	-17.29	539.17	435.81	508.08	-79.09
989.1	-18.04	539.3	435.72	509.57	-78.84
990	-19.1	537.25	435.15	508.97	-78.84
990.9	-17.96	538.57	435.76	509.19	-77.43
991.8	-16.87	538.64	435.46	509.52	-78.84
992.7	-17.28	538.27	436.06	507.52	-80.09
993.6	-18.9	537.68	434.06	508.18	-76.08
994.5	-17.28	537.58	434.79	508.18	-78.84
995.4	-17.76	537.37	435.05	507.14	-78.84
996.3	-17.85	538.31	435.4	509.44	-58.14
997.2	-19	538.23	434.31	507.79	-76.37
998.1	-18.07	537.4	435.03	507.86	-106.26
999	-15.6	536.13	433.1	508.56	-87.04
999.9	-18.34	537.3	432.83	506.37	-71.24
1000.8	-16.85	537.26	433.4	507.56	-67.13
1001.7	-17.47	536.26	432.49	506.88	-67.35
1002.6	-17.2	536.59	432.05	508.37	-66.21
1003.5	-16.39	536.48	433.82	505.78	-68.31
1004.4	-18.68	538.32	432.67	505.95	-65.48
1005.3	-14.93	537.87	431.97	506.41	-66.94
1006.2	-17.4	537.75	431.68	507.24	-64.94
1007.1	-16.34	535.89	432.97	507.4	-67.77
1008	-15.88	537.23	433.19	506.6	-66.7
1008.9	-18.16	536.81	431.93	505.75	-63.56
1009.8	-16.18	536.1	432.58	505.82	-66.13
1010.7	-18.63	536.34	432.43	505.88	-67.07
1011.6	-16.68	535.15	432.7	506.37	-65
1012.5	-16.95	536.11	432.58	505.8	-65.92
1013.4	-18	537.34	433.51	505.97	-60.03
1014.3	-18.63	535.27	431.41	505.54	-62.99
1015.2	-15.69	535.24	431.77	504.58	-61.14
1016.1	-16.43	536.64	432.85	506.4	-62.45
1017	-15.38	534.74	432.05	504.6	-62.23
1017.9	-19.1	534.53	430.32	504.15	-62.05
1018.8	-16.55	535.59	432.94	504.64	-64.46
1019.7	-18.02	534.89	431.03	504.46	-61.72
1020.6	-17.33	534.55	431.53	504.49	-61.9
1021.5	-17.56	533.21	431.06	503.48	-60
1022.4	-17.02	535.28	430.86	503.61	-60.66
1023.3	-18.15	536.2	432.26	502.48	-59.72
1024.2	-16.19	535.17	429.18	503.14	-59.54
1025.1	-17.06	535.81	429.48	502.03	-61.8
1026	-17.64	533.75	429.75	503.38	-63.36
1026.9	-15.8	535.23	431.21	502.83	-61.54
1027.8	-17.02	536.7	429.2	502.71	-60.17
1028.7	-14.77	534.44	430.64	501.75	-60.92
1029.6	-15.93	535.07	429.57	502.82	-59.16
1030.5	-14.46	534.31	429.28	504.08	-57.56
1031.4	-16.85	534.25	429.05	503.07	-59.76
1032.3	-18	534.2	429.8	503.94	-58.67
1033.2	-16.3	535.79	430.14	502.22	-58.11
1034.1	-18.41	534.73	429.52	502.42	-57.69
1035	-16.91	535.64	430.75	502.45	-59.1
1035.9	-15.17	533.86	430.08	502.41	-55.05
1036.8	-16.2	535.72	430.48	502.97	-58.32
1037.7	-17.98	532.6	429.33	500.14	-60.21
1038.6	-17.24	534.08	430.43	502.32	-56.1
1039.5	-18.36	533.34	429.82	500.38	-55.59
1040.4	-15.48	535.49	429.2	502.63	-57.38
1041.3	-16.45	532.94	428.33	501.86	-58.95
1042.2	-15.99	535.43	428.26	501.77	-57.42
1043.1	-16.92	532.7	426.49	501.96	-57.04
1044	-14.69	532.64	428.32	499.9	-58
1044.9	-16.81	534.12	429.7	501.17	-55.61
1045.8	-15.89	533.63	427.97	501.2	-56.23
1046.7	-15.55	533.97	429.36	499.39	-58.02
1047.6	-16.72	533.71	428.34	500.33	-55.2
1048.5	-16.26	534.07	427.41	500.53	-56.51
1049.4	-15.41	534.57	428.62	500.36	-56.54
1050.3	-16.57	532.78	428.52	500.4	-57.19
1051.2	-15.94	533.32	429.13	498.77	-54.84
1052.1	-16.57	533.26	429.15	498.93	-54.23
1053	-17.42	532.87	427.6	499.29	-54.3
1053.9	-15.25	532.91	428.26	498.02	-54.95
1054.8	-15.82	534.46	426.18	499.19	-54.96
1055.7	-15.25	532.68	428.04	499.44	-56.31
1056.6	-16.57	532.92	428.11	498.95	-55.37
1057.5	-15.57	531.18	426.72	499.91	-52.66
1058.4	-17.68	533.02	426.29	499.39	-54
1059.3	-16.08	531.67	428.36	498.22	-53.87
1060.2	-16.72	532.5	427.7	497.6	-57.39
1061.1	-17.32	532.54	428.66	499.13	-55.32
1062	-17.31	533.11	425.81	498.3	-52.94
1062.9	-15.3	531.77	426.46	496.35	-52.46
1063.8	-17.7	532.9	426.8	496.49	-55.12
1064.7	-14.7	532.97	426.35	496.75	-53.36
1065.6	-16.7	531.97	426.21	499.13	-53.13
1066.5	-15.53	532.52	427.79	497.86	-52.04
1067.4	-17.11	532.55	425.85	497.53	-51.98
1068.3	-15.04	532.61	426.11	497.72	-53.86
1069.2	-16.95	531.17	424.58	498.32	-52.15
1070.1	-16.97	531.73	425.81	498.94	-53.52
1071	-16.4	531.05	424.32	497.8	-52.21
1071.9	-16.14	530	426.71	498.24	-52.86
1072.8	-16.29	532.31	425.04	497.6	-52.31
1073.7	-15.31	530.86	425.3	498	-53.34
1074.6	-17.01	531.89	426.24	498.46	-50.64
1075.5	-17.26	531.5	423.58	497.01	-52.83
1076.4	-15.75	531.37	426.11	496.79	-54.51
1077.3	-16.42	531.96	424.42	495.47	-51.64
1078.2	-17.2	530.59	424.8	496.24	-52.17
1079.1	-14.48	531.72	425.45	496.14	-53.39
1080	-15.12	531.28	424.48	496.34	-51.92
1080.9	-14.07	530.3	424.57	496.19	-52.36
1081.8	-15.45	530.84	424.63	496.88	-52.1
1082.7	-14.98	530.25	424.16	496.08	-51.64
1083.6	-14.91	530.69	423.78	496	-52.63
1084.5	-16.72	530.48	424.14	495.03	-51.06
1085.4	-15.09	530.62	423.73	497	-49.87
1086.3	-15.86	529.75	424.8	494.83	-49.85
1087.2	-15.99	529.64	424.67	495.27	-52.67
1088.1	-14.97	530.73	422.46	494.68	-50.41
1089	-15.4	529.15	425.25	494.33	-49.14
1089.9	-15.43	530.2	424.1	494.44	-51.52
1090.8	-15.05	529.85	424.41	494.62	-51.77
1091.7	-15.08	530.22	425.74	495.12	-50.44
1092.6	-15.69	529.68	424.76	495.81	-51.17
1093.5	-13.15	530.81	423.61	494.65	-50.52
1094.4	-14.84	529.94	423.89	493.24	-50.2
1095.3	-12.63	530.38	422.87	495.09	-50.13
1096.2	-15.38	529.01	423.11	492.98	-50.13
1097.1	-15.15	529.46	423.25	492.1	-49.31
1098	-16.14	528.99	423.56	494.54	-48.54
1098.9	-15.87	528.5	423.83	494.5	-51.14
1099.8	-13.61	528.83	423.39	495.02	-49.83
1100.7	-15.7	529.79	422.72	494	-48.91
1101.6	-16.49	529.21	423.45	493.84	-50.21
1102.5	-15.39	528.38	423.16	493.96	-49.61
1103.4	-16.02	529.32	422.91	494.23	-50.09
1104.3	-15.45	528.73	424.02	493.17	-49.34
1105.2	-15.05	529.09	422.6	493.2	-50.1
1106.1	-15.71	528.57	420.08	492.45	-49.65
1107	-14.1	530.53	422.02	493.14	-49.46
1107.9	-14.13	528.67	421.92	493.12	-49.55
1108.8	-13.68	527.48	421.16	492.83	-50.92
1109.7	-14.57	529.3	422.35	493.04	-49.53
1110.6	-17.06	531.07	421.09	492.22	-47.32
1111.5	-15.76	529.74	421.52	492.18	-48.24
1112.4	-14.1	529.56	422.4	491.56	-48.58
1113.3	-14.31	529.21	421.51	490.36	-48.18
1114.2	-15.3	528.74	422.08	491.35	-50.96
1115.1	-17.17	529.24	422.88	490.39	-47.86
1116	-15.08	527.97	421.82	491.46	-47.36
1116.9	-16.72	526.73	419.76	491.91	-46.16
1117.8	-13.37	528.69	423.42	490.2	-47.52
1118.7	-13.59	528.78	419.57	490.6	-47.57
1119.6	-16.82	528.92	420.99	490.53	-45.46
1120.5	-16.23	529.02	420.9	491.29	-48.2
1121.4	-15.35	528.69	420.1	492.14	-50.07
1122.3	-15.22	528.23	419.63	491.34	-49.16
1123.2	-14.68	526.86	421.2	492.37	-49.06
1124.1	-16.34	527.41	420.48	488.66	-50
1125	-13.42	526.88	420.89	489.37	-47.13
1125.9	-16.33	527.36	420.14	490.29	-48.93
1126.8	-15.48	527.81	418.24	490.08	-47.88
1127.7	-13.83	527.96	420.75	490.09	-48.32
1128.6	-15	527.12	420.05	491.69	-46.64
1129.5	-16.11	528.16	419.21	489.57	-46.62
1130.4	-14	526.75	420.46	489.68	-46.33
1131.3	-16.95	528.25	420.47	489.51	-47.02
1132.2	-14.25	526.48	419.35	488.46	-48.55
1133.1	-14.09	526.56	418.72	490.25	-46.95
1134	-13.59	526.99	419.65	488.91	-47.42
1134.9	-16.46	526.54	419.68	488.59	-46.93
1135.8	-14.62	525.87	418.37	489.99	-47.4
1136.7	-15.42	528.44	418.82	490.43	-48.12
1137.6	-13.41	527.51	418.91	488.35	-47.3
1138.5	-15.15	527.46	418.79	488.48	-45.03
1139.4	-13.93	526.72	419.74	486.83	-46.3
1140.3	-14.77	526.7	418.06	488.96	-45.49
1141.2	-15.64	527.05	418.37	488.69	-47.47
1142.1	-15.39	527.43	418.91	487.56	-49.22
1143	-13.52	529.32	418.71	488.56	-45.62
1143.9	-14.94	526.94	418.72	490.37	-47.33
1144.8	-14.67	526.01	418.26	488.56	-43.49
1145.7	-14.39	525.22	417.21	489.25	-46.39
1146.6	-13.94	525.49	417.2	487.27	-48.75
1147.5	-13.56	526.99	418.6	488.27	-47.89
1148.4	-14.16	527.52	417.86	488.38	-45.63
1149.3	-13.51	525.66	416.35	488.73	-48
1150.2	-13.49	527.64	418.75	486.5	-46.28
1151.1	-15.99	524.74	418.6	487.81	-47.47
1152	-14.03	527.43	417.57	485.82	-48.03
1152.9	-15.2	526.63	416.71	486.94	-43.23
1153.8	-14.83	525.09	418.86	488.13	-46.89
1154.7	-15.16	527.09	417.38	487.96	-47.45
1155.6	-13.04	524.99	417.6	486.61	-45.74
1156.5	-13.53	526.08	416.55	490.53	-45.66
1157.4	-13.59	525.61	414.57	486.9	-46.63
1158.3	-15.21	525.37	416.94	486.67	-43.29
1159.2	-14.48	525.34	418.85	485.82	-47.53
1160.1	-14.72	524.98	416.68	485.63	-46.8
1161	-14.89	524.43	416.59	485.2	-46.98
1161.9	-13.3	524.65	417.02	486.84	-44.05
1162.8	-13.64	525.54	416.36	485.67	-46.37
1163.7	-13.75	525.52	417	486.75	-45.34
1164.6	-14.36	525.25	417.38	483.73	-44.23
1165.5	-13.54	525.06	416.6	483.95	-45.62
1166.4	-14.28	524.63	416.25	486.04	-43.2
1167.3	-13.95	525.94	417.14	486.64	-47.46
1168.2	-15.51	524.34	416.54	485.08	-47.06
1169.1	-13.33	525.58	416.49	485.08	-44.43
1170	-13.39	524.17	416.07	485.53	-43.76
1170.9	-14.42	524.14	414.83	485.31	-46.39
1171.8	-14.31	524.91	414.96	485.66	-44.95
1172.7	-13.14	523.84	417.06	483.99	-44.32
1173.6	-13.75	526	415.6	485.51	-44.89
1174.5	-13.39	524.94	416.06	484.64	-43.67
1175.4	-14.71	525.11	415.58	485.52	-43.4
1176.3	-14.42	524.98	416.53	484.25	-45.31
1177.2	-13.38	524.43	415.68	484.52	-43.07
1178.1	-14.25	524.65	415.2	485.02	-43.15
1179	-14.73	524.26	412.82	485.99	-41.67
1179.9	-13.19	524.62	415.47	484.31	-43.27
1180.8	-13.34	523.16	415.1	483.62	-43.12
1181.7	-14.54	525.37	414.92	483.91	-46.28
1182.6	-12.8	523.51	415.81	483.43	-44.73
1183.5	-14.41	524.18	416.12	483.97	-44.93
1184.4	-14.89	523.95	414.54	484.28	-45.86
1185.3	-13.35	521.82	414.53	484.16	-44.67
1186.2	-14.54	523.47	416.37	484.37	-42.21
1187.1	-13.49	521.74	414.38	483.64	-43.57
1188	-14.36	522.17	413.3	483.59	-42.95
1188.9	-14.47	523.44	416.03	482.81	-44.19
1189.8	-12.38	523.3	415.19	483.34	-46.51
1190.7	-12.96	523.59	414.43	483.31	-42.54
1191.6	-14.99	523.25	414.7	481.75	-40.84
1192.5	-14.73	523.01	412.7	482.6	-44.88
1193.4	-13.5	522.94	412.88	483.84	-42.48
1194.3	-15.26	522.04	413.97	482.71	-43.25
1195.2	-14.58	522.85	415.27	482.34	-44.15
1196.1	-14.4	522.91	411.21	482.06	-45.58
1197	-13.78	522.83	415.28	482.31	-41.7
1197.9	-14.29	524.5	415.76	481.28	-43.61
1198.8	-14.55	523.74	413.68	481.46	-42.4
1199.7	-12.83	523.43	413.84	482.96	-44.83
1200.6	-12.94	522.65	414.15	483.55	-44.6
1201.5	-13.38	523.69	413.01	480.08	-45.32
1202.4	-13.62	523.45	414.24	481.15	-43.32
1203.3	-12.39	522.31	412.23	482.26	-43.82
1204.2	-15.09	522.46	412.37	481.65	-42.99
1205.1	-13.54	522.64	412.27	480.3	-44.13
1206	-12.78	522.3	413.31	480.51	-43.07
1206.9	-14.46	522.05	413.31	480	-44.36
1207.8	-13.98	521.18	413.04	480.61	-43.84
1208.7	-15.24	523.17	412.37	482.06	-43.01
1209.6	-12.91	520.95	411.8	481.3	-43.42
1210.5	-13.68	521.95	412.19	480.55	-42.89
1211.4	-13.63	522.67	412.48	480.75	-44.18
1212.3	-14.5	521.17	411.39	481.24	-43.46
1213.2	-13.35	521.5	412.67	481.46	-41.53
1214.1	-14.67	521.87	412.32	480.31	-43.12
1215	-13.44	521.65	412.98	481.93	-43.81
1215.9	-11.25	521.81	411.21	479.25	-43.35
1216.8	-14.08	522.66	412.58	480.63	-43.49
1217.7	-13.33	522.19	413.19	480.33	-43.1
1218.6	-14.25	523.19	412.16	479.63	-44.41
1219.5	-12.67	521.97	414.26	480.29	-44.26
1220.4	-13.34	522.19	411.99	479.94	-42.1
1221.3	-13.22	521.9	409.66	478.35	-43.23
1222.2	-14.74	522.71	412.88	479.52	-43.55

## Sheet: Fig2B
	Ang2 WT 0.5mM	Ang2 BC5 0.5mM	Ang2 BC6 0.5mM	Ang2 BC10 0.5mM	Ang2 WT 1mM	Ang2 BC5 1mM	Ang2 BC6 1mM	Ang2 BC10 1mM	Ang2 WT 2mM	Ang2 BC5 2mM	Ang2 BC6 2mM	Ang2 BC10 2mM	Ang2 WT 4mM	Ang2 BC5 4mM	Ang2 BC6 4mM	Ang2 BC10 4mM
	1055	3883	3780	2845	985	6876	6477	5693	1244	8246	7696	9129	1455	10160	12105	10594
	994	3791	3497	3122	1199	5607	7202	4878	1298	8287	8283	8231	1435	10924	9120	11139
	1011	4157	3609	3664	1135	4893	5153	5081	1361	7002	8732	7744	1557	10312	10079	12004
SEM	18.1751	109.923	82.2847	240.515	63.4175	579.868	599.861	244.946	33.8083	421.666	299.951	405.641	37.7771	233.493	879.854	410.511
	Values are mean fluorescence intensity units (APC)

## Sheet: Fig2C
	Ang2 BC5 1um	Ang2 BC5 1um+ 1000ng/ml Ang1	Ang2 BC5 1um+ crgd 10uM	Ang2 BC5 1um+ 1000ng/ml Ang1+10uM C	Ang2 BC6 1um	Ang2 BC6 1um+ 1000ng/ml Ang1	Ang2 BC6 1um+ crgd 10uM	Ang2 BC6 1um+ 1000ng/ml Ang1+10uM C	Ang2 BC10 1um	Ang2 BC10 1um+ 1000ng/ml Ang1	Ang2 BC10 1um+ crgd 10uM	Ang2 BC10 1um+ 1000ng/ml Ang1+10uM	Ang2 WT 1um	Ang2 WT 1um+ 1000ng/ml Ang1	Ang2 WT 1um+ crgd 10uM	Ang2 WT 1um+ 1000ng/ml Ang1+10uM CR
	32505	25444	14575	8229	33752	26093	13772	10702	23362	16494	7618	5817	2573	1432	2029	1586
	28819	23721	13642	10253	31588	25859	12982	10303	21648	17871	7728	6005	2158	1225	2289	1612
	30778	27571	14893	9731	30165	25862	12036	11101	23678	16726	8137	5678	2264	1498	1902	1433
SEM	1064.76	1113.44	375.397	606.679	1042.82	77.5048	501.814	230.363	630.632	425.635	157.893	94.7494	124.486	82.2375	113.895	55.84
	Values are mean fluorescence intensity units (PE)

## Sheet: Fig4A
	cells only	Ang1	Ang1+crgd	Ang1+Ang2WT	Ang1+Ang2BC5	Ang1+Ang2BC6	Ang1+Ang2BC10
	1.531	1.676	1.134	1.411	0.716	0.972	1.026
	1.207	1.49	1.443	1.503	0.653	1.022	0.92
	1.235	1.358	1.114	1.322	0.745	0.931	0.905
SEM	0.103649	0.0922388	0.10649	0.0522526	0.0271559	0.0263122	0.0380803
	Values are UV Absorbance measured at 600 nm
	cells only	Ang1	Ang1+crgd	Ang1+Ang2WT	Ang1+Ang2BC5	Ang1+Ang2BC6	Ang1+Ang2BC10
	1.15605	1.26554	0.85628	1.06544	0.540649	0.733954	0.774729
	0.911402	1.12509	1.0896	1.13491	0.493078	0.771709	0.694689
	0.932545	1.02542	0.841178	0.998238	0.562547	0.702995	0.683363
SEM	0.078265	0.0696492	0.0804102	0.0394558	0.0205054	0.0198683	0.0287543
	Values are normalized to cell only control
	AVERAGE cells only
	1.32433

## Sheet: Fig4B
	cells only	crgd	Ang2WT	Ang2BC5	Ang2BC6	Ang2BC10
	0.392333	0.415333	0.363333	0.335333	0.266333	0.327333
	0.609333	0.370333	0.453333	0.400333	0.325333	0.248333
	0.537333	0.358333	0.470333	0.338333	0.346333	0.242333
SEM	0.0638131	0.0173494	0.0331981	0.0211844	0.0239467	0.0273882
	Values are Absorbance measured at 600 nm
	cells only	crgd	Ang2WT	Ang2BC5	Ang2BC6	Ang2BC10
	0.764782	0.809617	0.708252	0.653671	0.519168	0.638076
	1.18778	0.721898	0.883691	0.780377	0.634178	0.48408
	1.04743	0.698506	0.916829	0.659519	0.675113	0.472384
SEM	0.124392	0.0338195	0.0647136	0.0412951	0.0466798	0.0533883
	Values are normalized to cells only control
	AVERAGE cells only
	0.513
	0.764782	0.809617	0.708252	0.653671	0.519168	0.638076
	1.18778	0.721898	0.883691	0.780377	0.634178	0.48408
	1.04743	0.698506	0.916829	0.659519	0.675113	0.472384

## Sheet: Fig4C
		Values obtained from band intensity measurements (ImageJ software)								intensity to area				Ratio	Normalization to basal level control
		p-Tie2 mean	p-Tie2 area	Tie2 mean	Tie2 area	actin p-Tie2 mean	actin p-Tie2 area	actin Tie2 mean	actin Tie2 area	p-tie2	tie2	actin p-tie2	actin tie2	(p/a)/(T/a)		SEM
	Basal level	61.57	1326.94	82.48	1199.44	114.47	1333.71	97.18	1664.65	81699.7	98929.8	152670	161771	0.875064	1.06445	0.0322811
	Basal level	42.47	1260.81	57.81	1323.52	93.17	1786.98	87.99	2151.24	53546.6	76512.7	166493	189288	0.795655	0.967852
	Basal level	39.75	1656.72	59.57	1284.23	84.55	1786.98	74.66	1869.53	65854.6	76501.6	151089	139579	0.795249	0.967358
	ang1 500ng/ml	70.51	1877.73	42.42	1394.86	111.67	1721.79	55.73	2381.73	132399	59170	192272	132734	1.54471	1.87902	0.0920189
	ang1 500ng/ml	81.76	1651.5	53.52	1296.63	103.97	1534.27	57.45	2202.46	135027	69395.6	159518	126531	1.54339	1.87741
	ang1 500ng/ml	70.17	1651.5	49.79	1296.63	111.13	1534.27	60.31	2074.41	115886	64559.2	170503	125108	1.31711	1.60216
	crgd 1uM +Ang1 500ng/ml	75.38	1893.99	120.99	974.19	96.86	2034.89	103.55	1725	142769	117867	197099	178624	1.09773	1.3353	0.178069
	crgd 1uM +Ang1 500ng/ml	56.19	1893.99	97.27	878.14	90.73	2034.89	54.05	1725	106423	85416.7	184626	93236.2	0.629197	0.76537
	crgd 1uM +Ang1 500ng/ml	26.14	2189.93	53.12	984.97	34.04	2637.68	33.55	2523	57244.8	52321.6	89786.6	84646.6	1.03146	1.25469
	Ang2wt 1uM +Ang1 500ng/ml	27.41	1479.21	52.29	1296.63	96.49	1257.5	120.75	1920.75	40545.1	67800.8	121336	231931	1.14307	1.39045	0.0644509
	Ang2wt 1uM +Ang1 500ng/ml	56.51	1479.21	58.32	1296.63	104.24	1543.3	71.39	2100.02	83590.2	75619.5	160874	149920	1.03014	1.25309
	Ang2wt 1uM +Ang1 500ng/ml	43.13	1479.21	61.23	1509.64	98.47	1543.3	100.79	2100.02	63798.3	92435.3	151969	211661	0.961298	1.16934
	Ang2 bc5 1uM +Ang1 500ng/ml	61.68	1893.99	113.95	1066.31	79.32	1670.38	29.1	1932	116821	121506	132495	56221.2	0.407968	0.496262	0.0841097
	Ang2 bc5 1uM +Ang1 500ng/ml	47.87	1893.99	133.11	974.19	75.38	1709.3	58.97	1932	90665.3	129674	128847	113930	0.618231	0.75203
	Ang2 bc5 1uM +Ang1 500ng/ml	12.9	1893.99	58.52	974.19	55.55	2105.66	48.8	2314	24432.5	57009.6	116969	112923	0.413743	0.503286
	Ang2 bc6 1uM +Ang1 500ng/ml	33.36	1447.89	88.7	1296.63	86.85	988.75	53.85	2074.41	48301.6	115011	85872.9	111707	0.546319	0.664554	0.0766534
	Ang2 bc6 1uM +Ang1 500ng/ml	35.15	1447.89	64.44	1296.63	86.85	988.75	28.76	2074.41	50893.3	83554.8	85872.9	59660	0.423172	0.514755
	Ang2 bc6 1uM +Ang1 500ng/ml	18.85	1447.89	62.57	1296.63	88.8	1108.09	90.36	2074.41	27292.7	81130.1	98398.4	187444	0.640837	0.779528
	Ang2 bc10 1uM +Ang1 500ng/ml	29.58	1447.89	71.91	1296.63	85.09	1108.09	36.15	1895.14	42828.6	93240.7	94287.4	68509.3	0.333752	0.405984	0.114358
	Ang2 bc10 1uM +Ang1 500ng/ml	26.7	1447.89	81.75	1296.63	65.85	1632.55	102.18	1895.14	38658.7	106000	107503	193645	0.656943	0.79912
	Ang2 bc10 1uM +Ang1 500ng/ml	28.96	1447.89	85.81	1296.63	86.85	988.75	50.6	2074.41	41930.9	111264	85872.9	104965	0.460648	0.560342

## Sheet: Fig4E
		Values obtained from band intensity measurements (ImageJ software)								intensity to area				Ratio	Normalization to basal level control
		p-Akt mean	p-Akt area	Akt mean	Akt area	actin p-Akt mean	actin p-Akt area	actin Akt mean	actin Akt 2 area	p-Akt	Akt	actin p-Akt	actin Akt	(p/a)/(A/a)		SEM
	Basal level	31.16	1410.87	83.62	1309.29	61.66	2361.78	81.81	1546.04	43962.7	109483	145627	126482	0.348757	1.00946	0.0550462
	Basal level	28.85	1410.87	92.17	1309.29	55.61	2361.78	94.87	1546.04	40703.6	120677	131339	146673	0.376673	1.09026
	Basal level	27.19	1410.87	81.84	1563.88	57.12	2672.54	80.42	1969.85	38361.6	127988	152655	158415	0.311037	0.90028
	ang1 500ng/ml	74.96	1480.55	72.97	1212.31	78.09	2390.72	88.49	1691.29	110982	88462.3	186691	149662	1.00573	2.91104	0.101908
	ang1 500ng/ml	99.07	1158.31	65.28	1212.31	63.89	2312.49	62.59	1815.65	114754	79139.6	147745	113642	1.11531	3.22822
	ang1 500ng/ml	88.06	1517.56	73.75	1202.21	68.45	2312.49	58.66	1815.65	133636	88663	158290	106506	1.01415	2.93541
	crgd 1uM +Ang1 500ng/ml	84.65	2248.66	98.35	2759.76	84.53	3145.22	146.05	2107.33	190349	271422	265865	307776	0.811853	2.34987	0.197546
	crgd 1uM +Ang1 500ng/ml	89.48	2248.66	95.2	2759.76	95.27	2275.14	136.23	2107.33	201210	262729	216753	287082	1.01434	2.93595
	crgd 1uM +Ang1 500ng/ml	86.01	2248.66	72.37	2759.76	88.54	2573.36	113.75	2107.33	193407	199724	227845	239709	1.01879	2.94885
	Ang2wt 1uM +Ang1 500ng/ml	84.42	1410.87	88.46	1309.29	52.63	2361.78	76.96	1546.04	119106	115820	124300	118983	0.984379	2.84924	0.0312679
	Ang2wt 1uM +Ang1 500ng/ml	87.07	1410.87	93.79	1309.29	53.27	2361.78	82.51	1546.04	122844	122798	125812	127564	1.0143	2.93585
	Ang2wt 1uM +Ang1 500ng/ml	79.97	1410.87	84.36	1309.29	54.91	2361.78	83.66	1546.04	112827	110452	129685	129342	1.0188	2.94887
	Ang2 bc5 1uM +Ang1 500ng/ml	61.02	1184.44	87.5	1516.4	55.38	2169.97	66.15	1807.69	72274.5	132685	120173	119579	0.542014	1.56883	0.0932654
	Ang2 bc5 1uM +Ang1 500ng/ml	71.39	1184.44	90.99	1516.4	62.54	2169.97	61.7	1807.69	84557.2	137977	135710	111534	0.503664	1.45783
	Ang2 bc5 1uM +Ang1 500ng/ml	64.2	1184.44	87.13	1516.4	60.1	2169.97	54.16	1807.69	76041	132124	130415	97904.5	0.432057	1.25057
	Ang2 bc6 1uM +Ang1 500ng/ml	49.1	1184.44	84.29	1516.4	61.41	2169.97	54.76	1807.69	58156	127817	133258	98989.1	0.337986	0.978284	0.115462
	Ang2 bc6 1uM +Ang1 500ng/ml	53.23	1184.44	85.97	1516.4	64.49	2169.97	73.17	1807.69	63047.7	130365	139941	132269	0.457109	1.32308
	Ang2 bc6 1uM +Ang1 500ng/ml	47.68	1517.56	86.03	1516.4	69.73	2850.43	83.44	1967.86	72357.3	130456	198760	164198	0.458202	1.32624
	Ang2 bc10 1uM +Ang1 500ng/ml	65.12	1606.83	89.85	1333.54	54.39	2734.7	64.74	2101.18	104637	119819	148740	136030	0.79867	2.31171	0.0949712
	Ang2 bc10 1uM +Ang1 500ng/ml	72.96	1410.87	105.01	1197.16	49.83	2361.78	69	1772.87	102937	125714	117687	122328	0.851108	2.46349
	Ang2 bc10 1uM +Ang1 500ng/ml	73.59	1410.87	101.16	1272.93	49.12	2361.78	51.68	2053.42	103826	128770	116011	106121	0.737556	2.13482

## Sheet: Fig4G
		Values obtained from band intensity measurements (ImageJ software)								intensity to area				Ratio	Normalization to basal level control
		p-FAK mean	p-FAK area	FAK mean	FAK area	actin p-FAK mean	actin p-FAK area	actin FAK mean	actin FAK 2 area	p-FAK	FAK	actin p-FAK	actin FAK	(p/a)/(F/a)		SEM
	Basal level	96.59	706.73	65.9	993.52	123.9	1241.2	93.37	1543.65	68263.1	65473	153785	144131	0.977162	1.04759	0.0255039
	Basal level	120.2	578.23	84.01	816.18	113.04	1093.2	84.09	1298.63	69503.2	68567.3	123575	109202	0.895749	0.960309
	Basal level	112.85	578.23	66.63	816.18	116.37	1243.24	85.92	1298.63	65253.3	54382.1	144676	111578	0.925401	0.992099
	ang1 500ng/ml	156.01	591.08	84.47	816.18	127.35	1243.24	84.49	1082.03	92214.4	68942.7	158327	91420.7	0.772327	0.827992	0.0537435
	ang1 500ng/ml	150.64	591.08	74.38	816.18	116.63	1243.24	78.38	1082.03	89040.3	60707.5	144999	84809.5	0.857875	0.919706
	ang1 500ng/ml	129.42	642.48	55.32	816.18	109.75	1527.01	79.56	1082.03	83149.8	45151.1	167589	86086.3	0.945977	1.01416
	crgd 1uM +Ang1 500ng/ml	102.77	734.26	77.45	979.42	116.59	1197.31	118.04	1164.36	75459.9	75856.1	139594	137441	0.979432	1.05002	0.0176472
	crgd 1uM +Ang1 500ng/ml	102.3	646.15	77.83	834.32	110.08	1079.93	119.3	960.5	66101.1	64935.1	118879	114588	0.981213	1.05193
	crgd 1uM +Ang1 500ng/ml	106.84	646.15	62.1	834.32	104.99	1543.34	114.79	1090.85	69034.7	51811.3	162035	125219	1.02968	1.10389
	Ang2wt 1uM +Ang1 500ng/ml	90.13	539.68	57.12	746.65	116	1053.39	116.26	744.87	48641.4	42648.6	122193	86598.6	0.808284	0.866541	0.03812
	Ang2wt 1uM +Ang1 500ng/ml	103.04	539.68	65.28	746.65	117.4	1150.36	101.85	1034.98	55608.6	48741.3	135052	105413	0.890504	0.954687
	Ang2wt 1uM +Ang1 500ng/ml	102.32	706.73	69.22	979.42	103.95	1698.49	118.84	1293.73	72312.6	67795.5	176558	153747	0.928822	0.995766
	Ang2 bc5 1uM +Ang1 500ng/ml	72.37	578.23	98.38	816.18	100.25	1102.38	90.97	1058.51	41846.5	80295.8	110514	96292.7	0.454092	0.486821	0.0183637
	Ang2 bc5 1uM +Ang1 500ng/ml	88.63	619.53	121.55	816.18	98.87	1326.94	89.93	1058.51	54908.9	99206.7	131195	95191.8	0.401593	0.430537
	Ang2 bc5 1uM +Ang1 500ng/ml	79.71	619.53	104.18	816.18	97.54	1326.94	95.12	1058.51	49382.7	85029.6	129430	100685	0.451791	0.484354
	Ang2 bc6 1uM +Ang1 500ng/ml	70.61	619.53	95.65	816.18	98.01	1326.94	100.65	1058.51	43745	78067.6	130053	106539	0.459034	0.492119	0.050765
	Ang2 bc6 1uM +Ang1 500ng/ml	65.82	619.53	108.6	816.18	96.09	1326.94	99.04	1255.51	40777.5	88637.1	127506	124346	0.448648	0.480984
	Ang2 bc6 1uM +Ang1 500ng/ml	65.82	619.53	59.97	1148.7	80.98	1963.88	119.35	1340.77	40777.5	68887.5	159035	160021	0.595612	0.638541
	Ang2 bc10 1uM +Ang1 500ng/ml	88.65	693.88	84.54	1033.83	116.89	1306.53	132.68	1340.77	61512.5	87400	152720	177893	0.819813	0.878901	0.0378886
	Ang2 bc10 1uM +Ang1 500ng/ml	80.96	629.63	92.31	961.28	99.29	1257.53	129.66	1182	50974.8	88735.8	124860	153258	0.70511	0.755931
	Ang2 bc10 1uM +Ang1 500ng/ml	92.36	629.63	73.32	961.28	120.85	1302.45	129.04	1182	58152.6	70481	157401	152525	0.799523	0.857149

[truncated: 8 more sheets: Fig5B, Fig5C, Fig6B, FigS1B, FigS2A, FigS2B, FigS2C, FigS2D]
